# Supplementary material
Source: PubMed Central journal article supplement (PMC6453168)
Supplement: Online_material.pdf [file Online_material.pdf]

## Appendix S1. Search strategy

### CINAHL (EBSCO)

S1 .(MH "Cerebrovascular Disorders+") or (MH "stroke patients") or (MH "stroke units")

S2 .TI ( stroke or poststroke or post-stroke or cerebrovasc\* or brain vas\* or cerebral vas\* or cva or apoplex or SAH ) or AB ( stroke or poststroke or post-stroke or cerebrovasc\* or brain vas\* or cerebral vas\* or cva or apoplex or SAH )

S3 .TI ( brain\* or cerebr\* or cerebell\* or intracran\* or intracerebral ) or AB ( brain\* or cerebr\* or cerebell\* or intracran\* or intracerebral )

S4 .TI ( ischemi\* or ischaemi\* or infarct\* or thrombo\* or emboli\* or occlus\* ) or AB ( ischemi\* or ischaemi\* or infarct\* or thrombo\* or emboli\* or occlus\* )

S5 .S3 and S4

S6 .TI ( brain\* or cerebr\* or cerebell\* or intracerebral or intracranial or subarachnoid ) or AB ( brain\* or cerebr\* or cerebell\* or intracerebral or intracranial or subarachnoid )

S7 .TI ( haemorrhage\* or hemorrhage\* or haematoma\* or hematoma\* or bleed\* ) or AB ( haemorrhage\* or hemorrhage\* or haematoma\* or hematoma\* or bleed\* )

S8 .S6 and S7

S9 .S1 or S2 or S5 or S8

S10 .(MH "Thrombosis") or (MH "thromboembolism") or (MH "venous thrombosis") or (MH "venous thromboembolism") or (MH "thrombophlebitis")

S11 .TI thrombophlebit\* or AB thrombophlebit\*

S12 .TI venous N5 thrombo\* or AB venous N5 thrombo\*

S13 .TI vein N5 thrombo\* or AB vein N5 thrombo\*

S14 .TI (DVT OR VTE) or AB (DVT OR VTE)

S15 .TI thromboprophylaxis or AB thromboprophylaxis

S16 .TI phlebothrombosis or AB phlebothrombosis

S17 .MH "pulmonary embolism"

S18 .MH "pulmonary artery" and MH "embolism"

S19 .TI (pulmonary or lung) or AB (pulmonary or lung)

S20 .TI (embol\* or thrombo\* or infarct\*) or AB (embol\* or thrombo\* or infarct\*)

S21 .S19 and S20

S22 .S10 OR S11 OR S12 OR S13 OR S14 OR S15 OR S16 OR S17 OR S18 OR S21

S23 .S9 AND S22

S24 .PT randomized controlled trial or clinical trial

S25 .(MH "Random Assignment") or (MH "Random Sample+")

S26 .(MH "Crossover Design") or (MH "Clinical Trials+")

S27 .(MH "Control (Research)") or (MH "Control Group")

S28 .(MH "Factorial Design") or (MH "Quasi-Experimental Studies") or (MH "Nonrandomized Trials")

S29 .(MH "Placebo Effect") or (MH "Placebos") or (MH "Meta Analysis")

S30 .(MH "Clinical Research") or (MH "Clinical Nursing Research")

S31 .(MH "Community Trials") or (MH "Experimental Studies or (MH "Study Design")

S32 .PT systematic review

S33 .TI (random\* or RCT or RCTs) or AB (random\* or RCT or RCTs)

S34 .TI ( singl\* or doubl\* or tripl\* or trebl\* ) or AB ( singl\* or doubl\* or tripl\* or trebl\* )

S35 .TI ( blind\* or mask\* ) or AB ( blind\* or mask\* )

S36 .S34 and S35

S37 .TI ( crossover or cross-over or placebo\* or controls or factorial or sham or assign\* or allocat\* )  
or AB ( crossover or cross-over or placebo\* or controls or factorial or sham or assign\* or allocat\* )

S38 .TI ( clin\* or control\* or intervention\* or compar\* or experiment\* or preventive or therapeutic )  
or AB ( clin\* or control\* or intervention\* or compar\* or experiment\* or preventive or therapeutic )

S39 .TI trial\*

S40 .S38 and S39

S41 .TI ( meta analysis\* or metaanalysis or meta-analysis or systematic review\* ) or AB ( meta  
analysis\* or metaanalysis or meta-analysis or systematic review\* )

S42 .PT meta analysis

S43 .AB cochrane or medline or pubmed or embase or cinahl or cinhal or science citation index or reference list\* or bibliograph\* or hand-search\* or handsearch\* or relevant journals or manual search\*

S44 .S24 OR S25 OR S26 OR S27 OR S28 OR S29 OR S30 OR S31 OR S32 OR S33 OR S36 OR S37 OR S40 OR S41 OR S42 OR S43

S45 .S23 AND S44

.Appendix S2

Figure 1.1 Effect of thigh-length GCS on death or dependency at six months

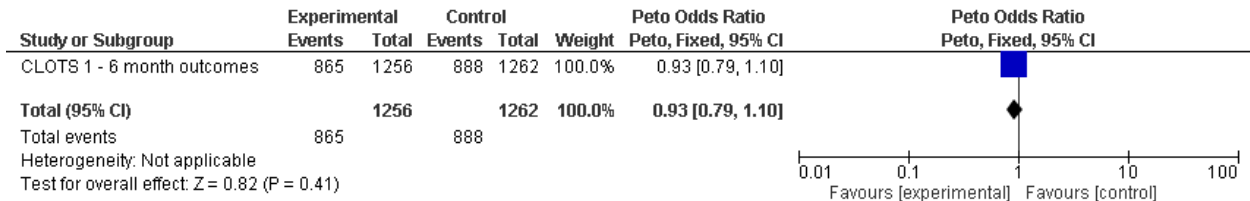

Figure 1.2 Effect of thigh-length GCS on death within the treatment period

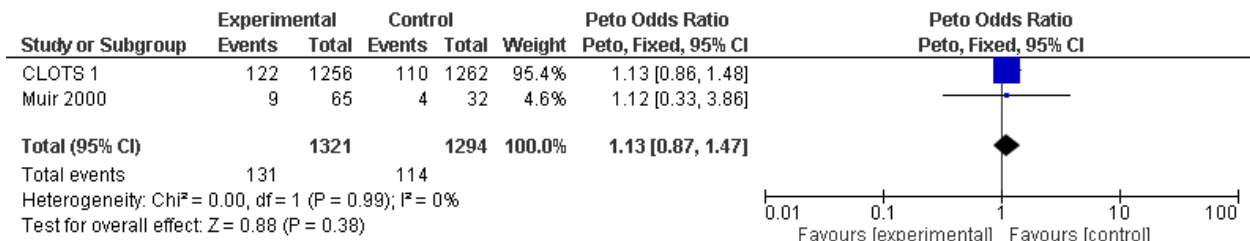

Figure 1.3 Effect of thigh-length GCS on any PE during treatment period

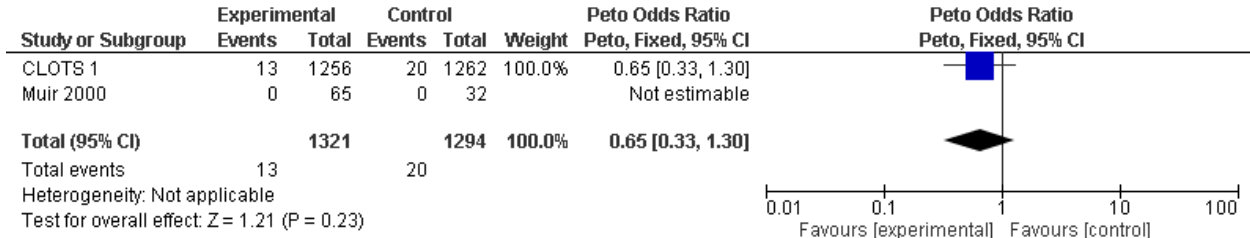

Figure 1.4 Effect of thigh-length GCS on any DVT during treatment period

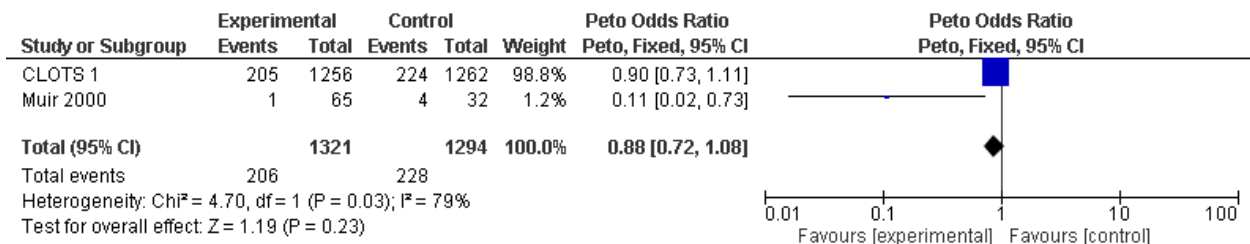

Figure 1.5 Effect of thigh-length GCS on skin breaks during treatment period

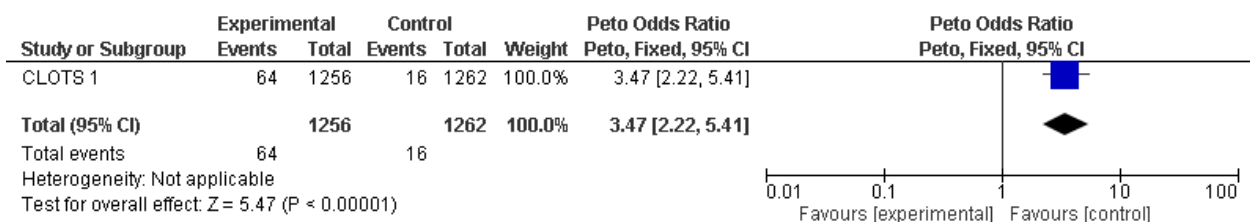

Figure 2.1 The effect of IPC on death or dependency at final follow up

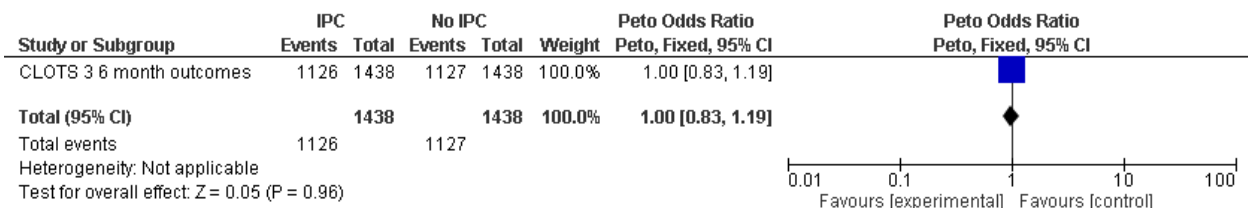

Figure 2.2 The effect of IPC on death within the treatment period

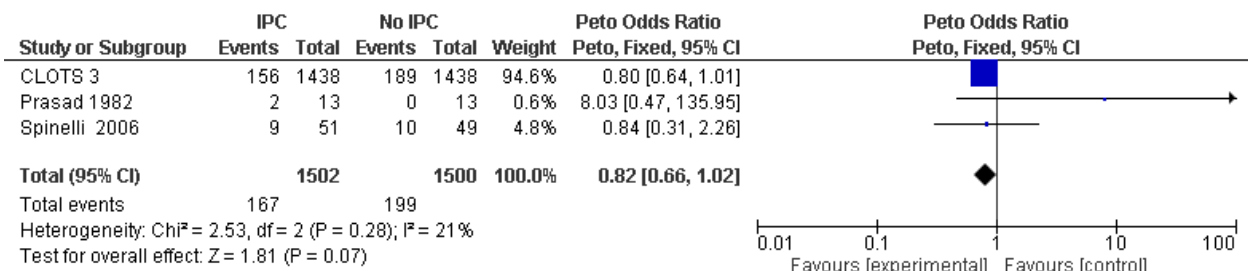

Figure 2.3 The effect of IPC on PE during treatment period

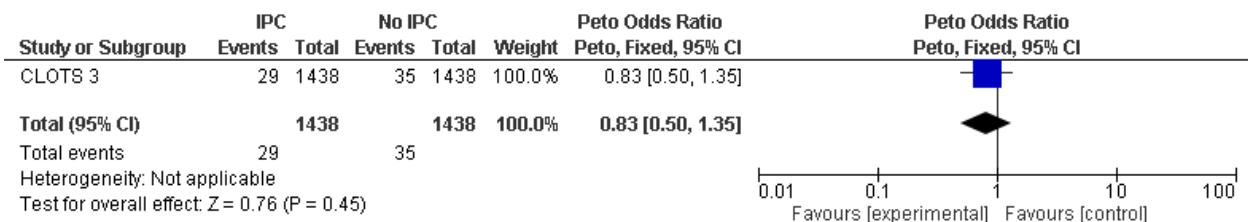

Figure 2.4 The effect of IPC on symptomatic DVT during treatment period

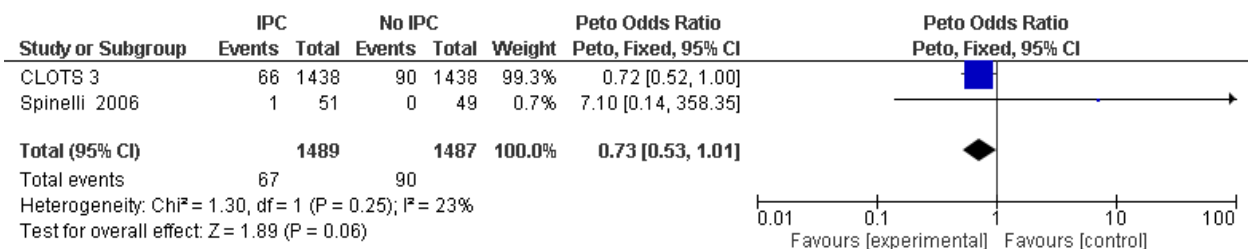

Figure 2.5 The effect of IPC on any DVT (including asymptomatic)

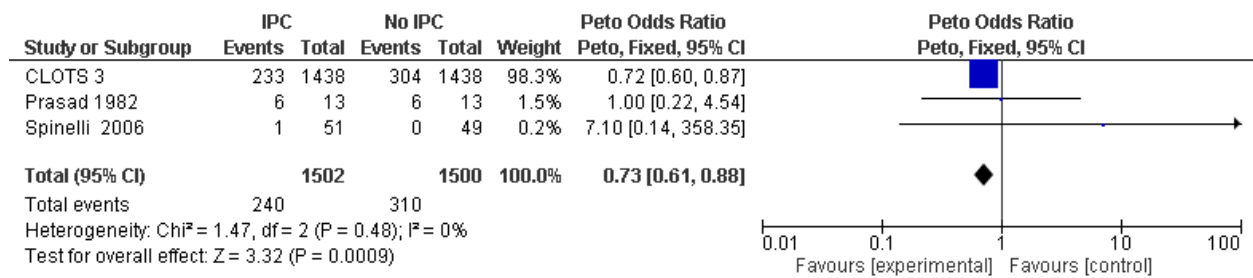

Figure 2.6 The effect of IPC on skin breaks during treatment period

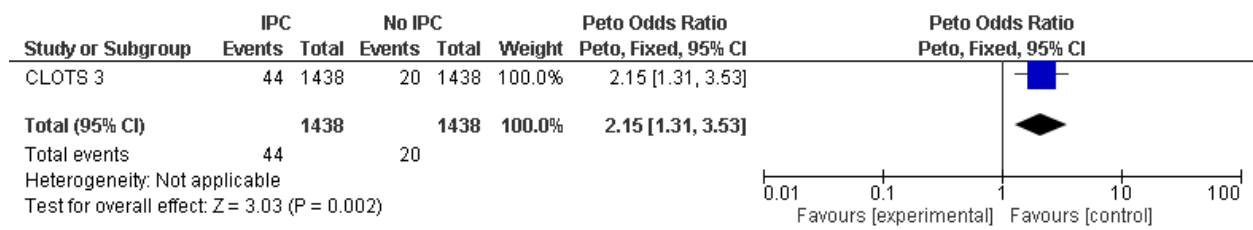

Figure 3.1 The effect on prophylactic anticoagulants of death or dependency at final follow up

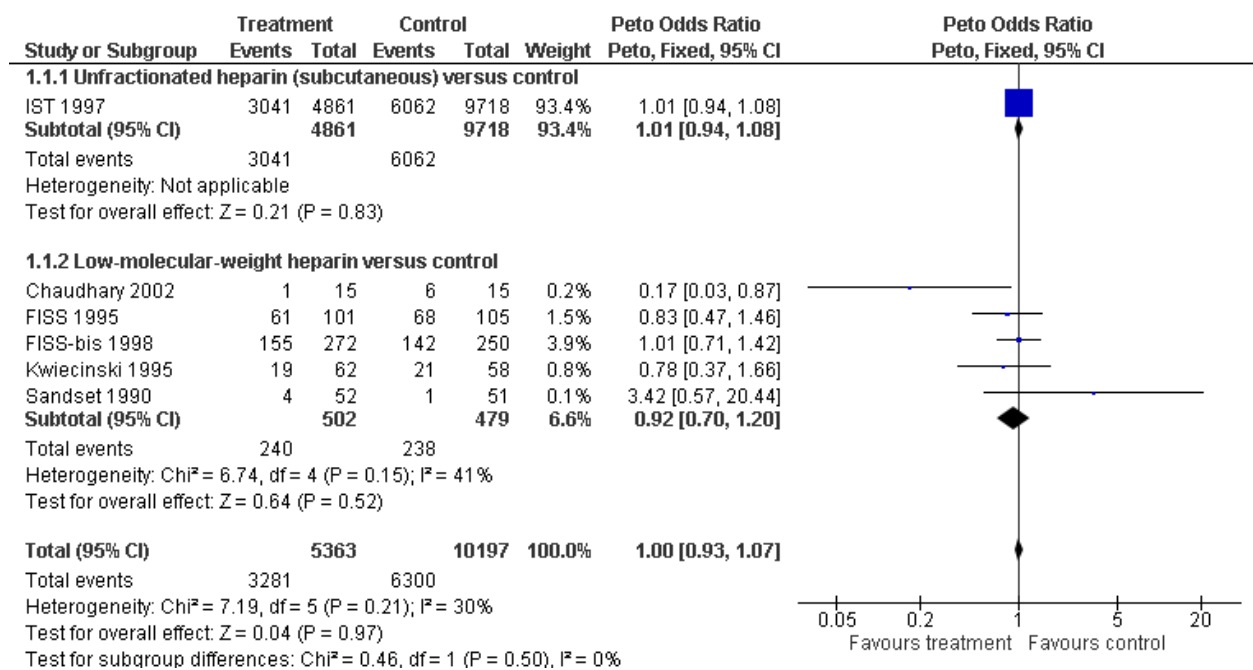

Figure 3.2 The effect of prophylactic anticoagulants on death during treatment

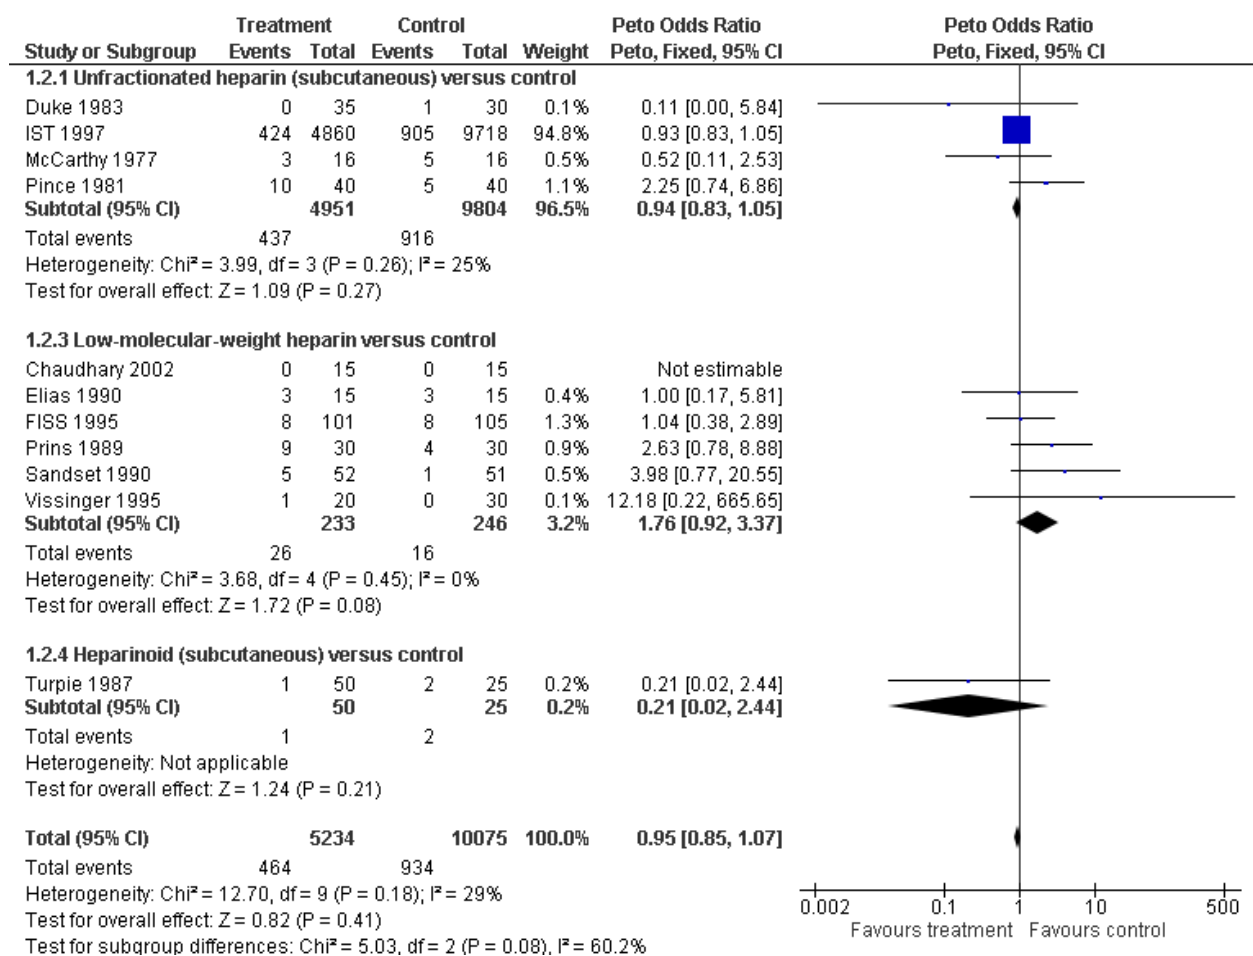

Figure 3.3 The effect of prophylactic anticoagulation on symptomatic intracranial bleeding during treatment period

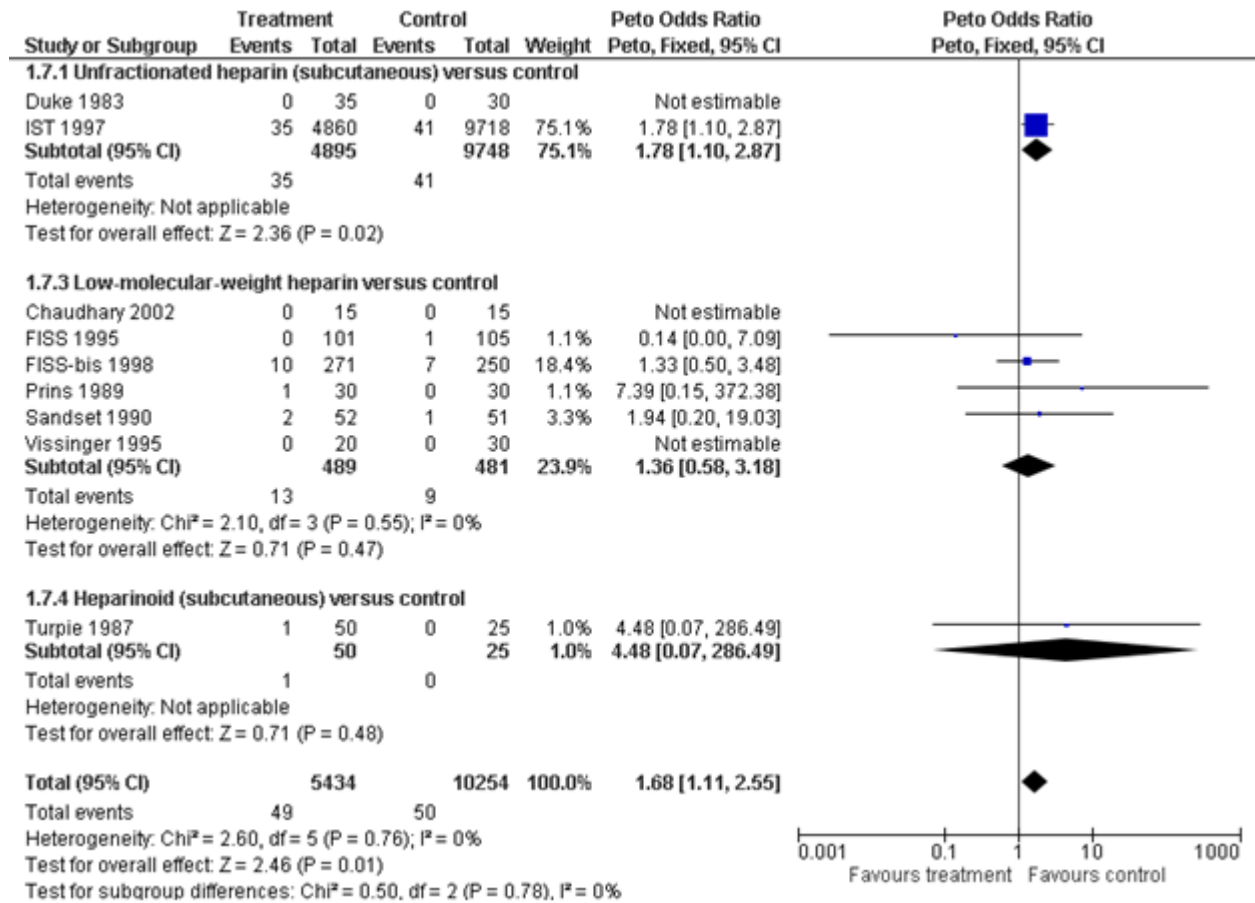



Figure 3.4 The effect on prophylactic anticoagulants on PE during treatment

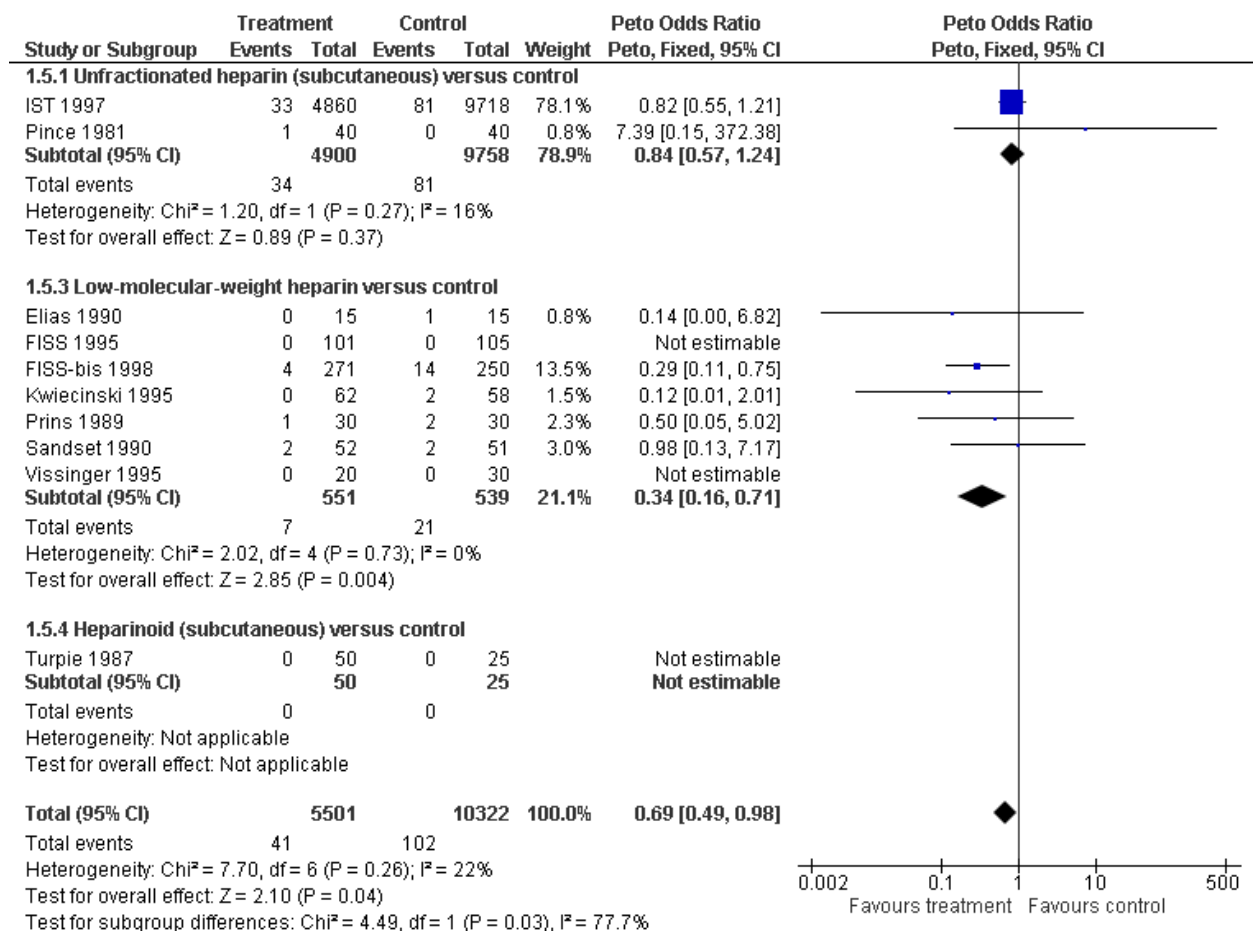

Figure 3.5 The effect of prophylactic anticoagulation on symptomatic extracranial bleeding during treatment period

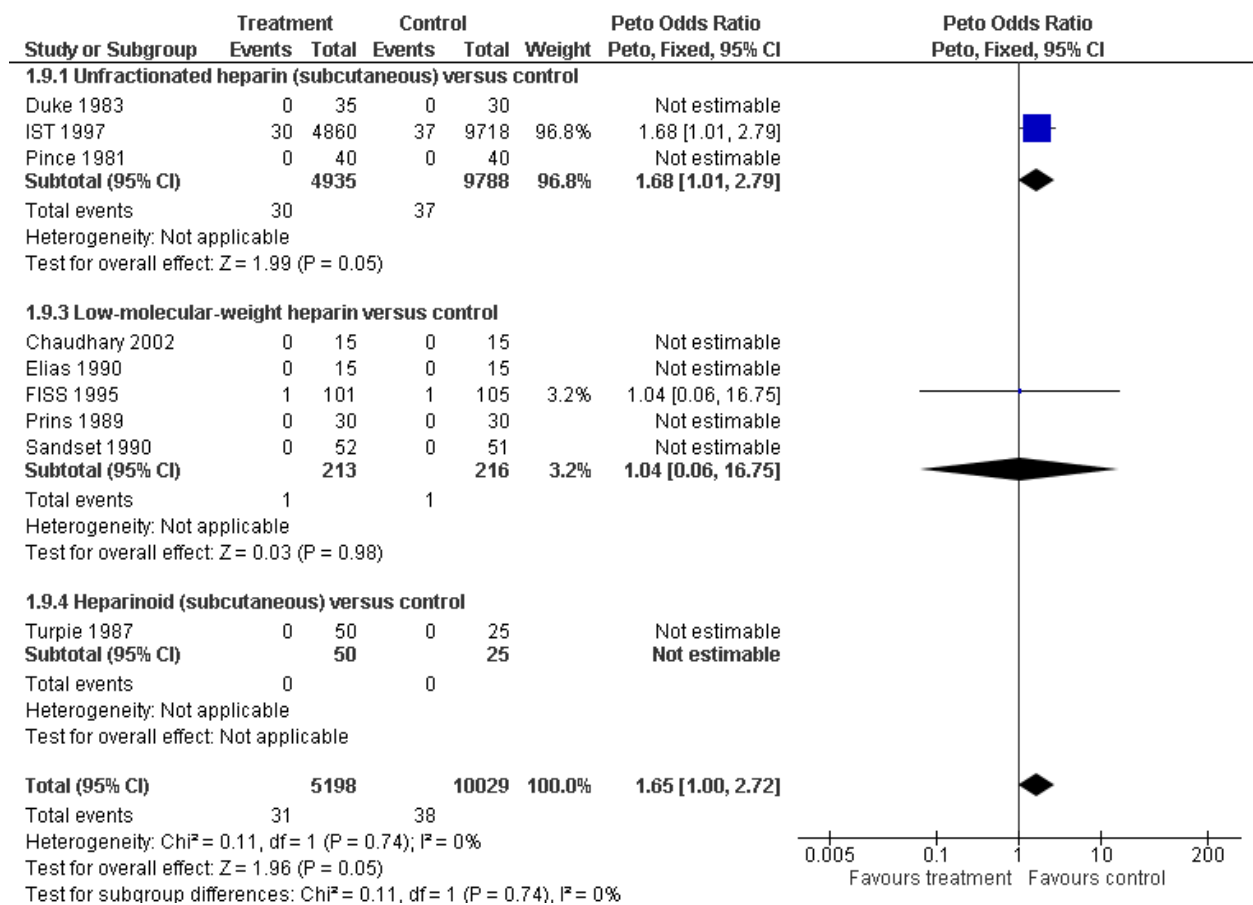

Figure 3.6 The effect on prophylactic anticoagulants on any DVT (including Isotope scanning) only during treatment

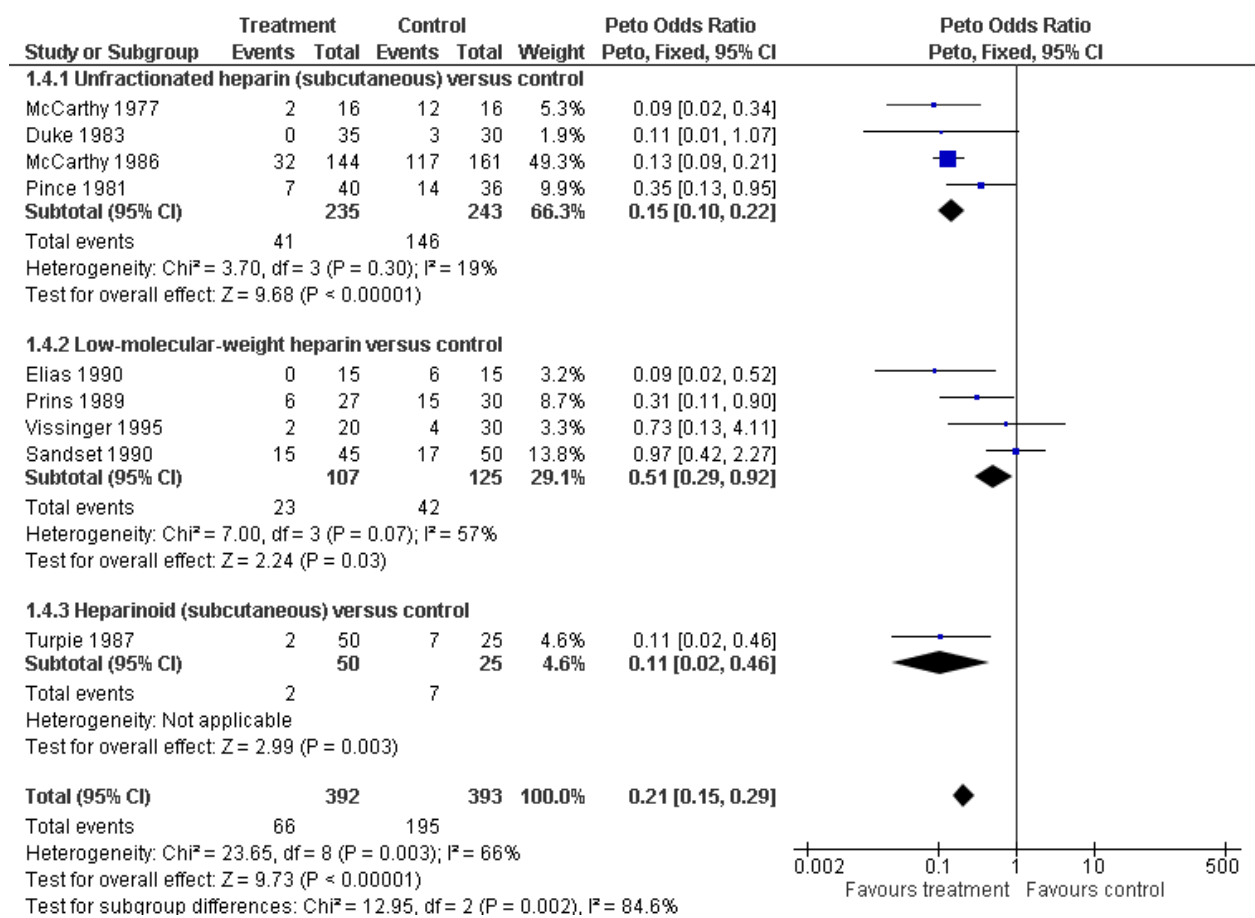

Figure 4.1 The effect of LMWH compared with unfractionated heparin on Death or dependency at final follow up

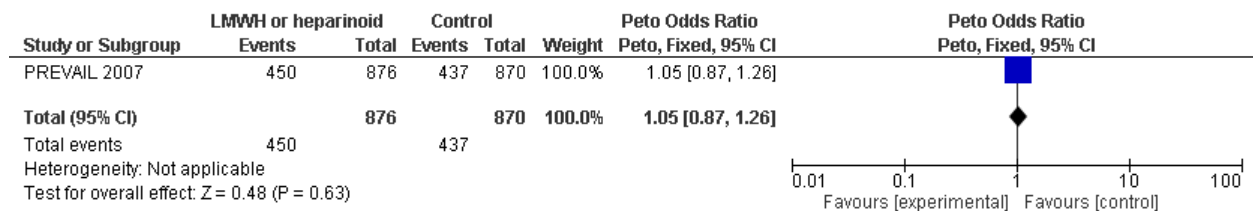

Figure 4.2 The effect of LMWH compared with unfractionated heparin on Death from all causes during follow up

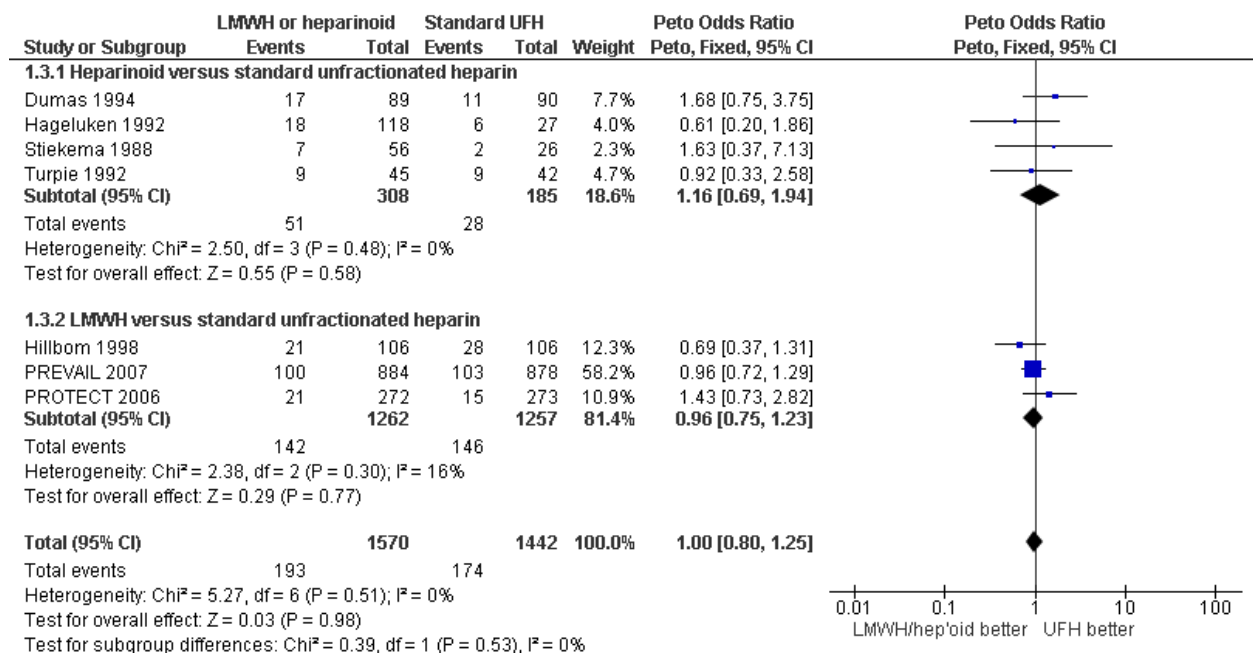

Figure 4.3 The effect of LMWH compared with unfractionated heparin on Symptomatic intracranial bleeding

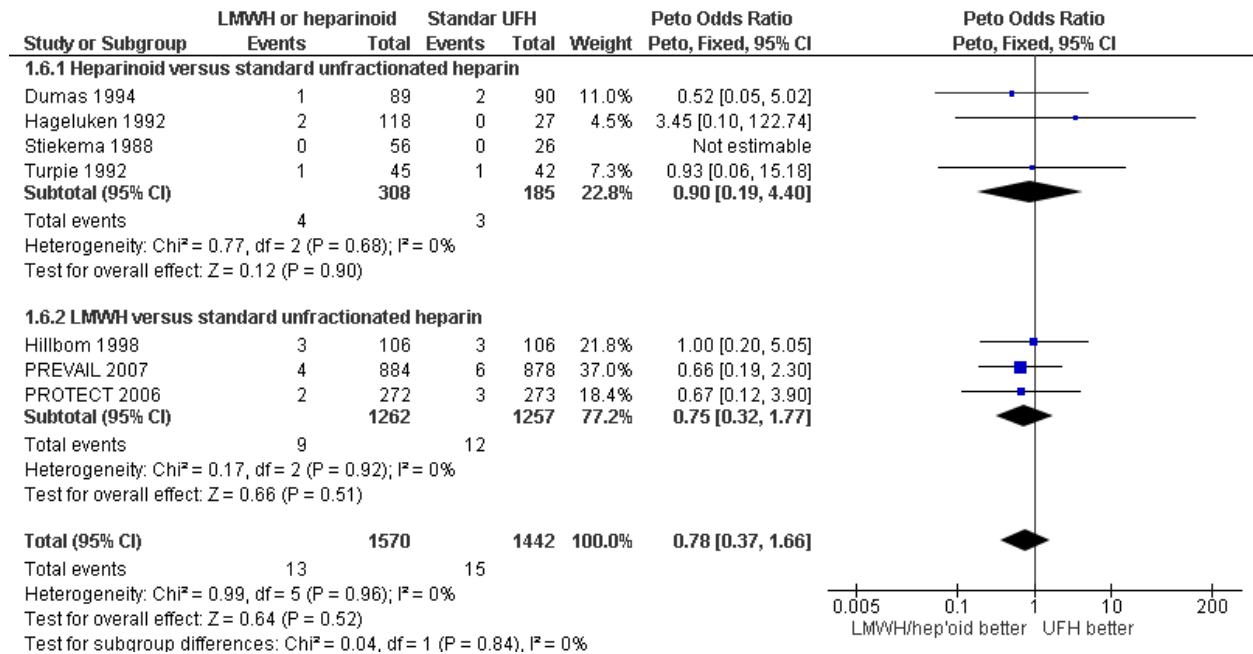

Figure 4.4 The effect of LMWH compared with unfractionated heparin on Pulmonary emboli

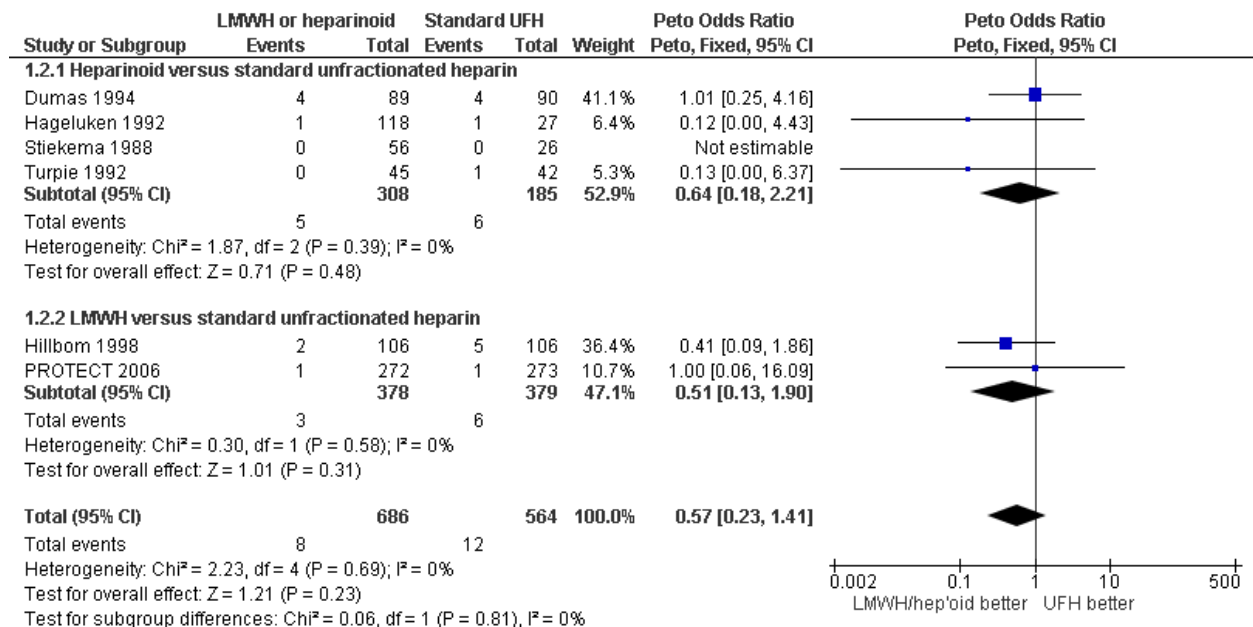

Figure 4.5 The effect of LMWH compared with unfractionated heparin on Extracranial bleeding

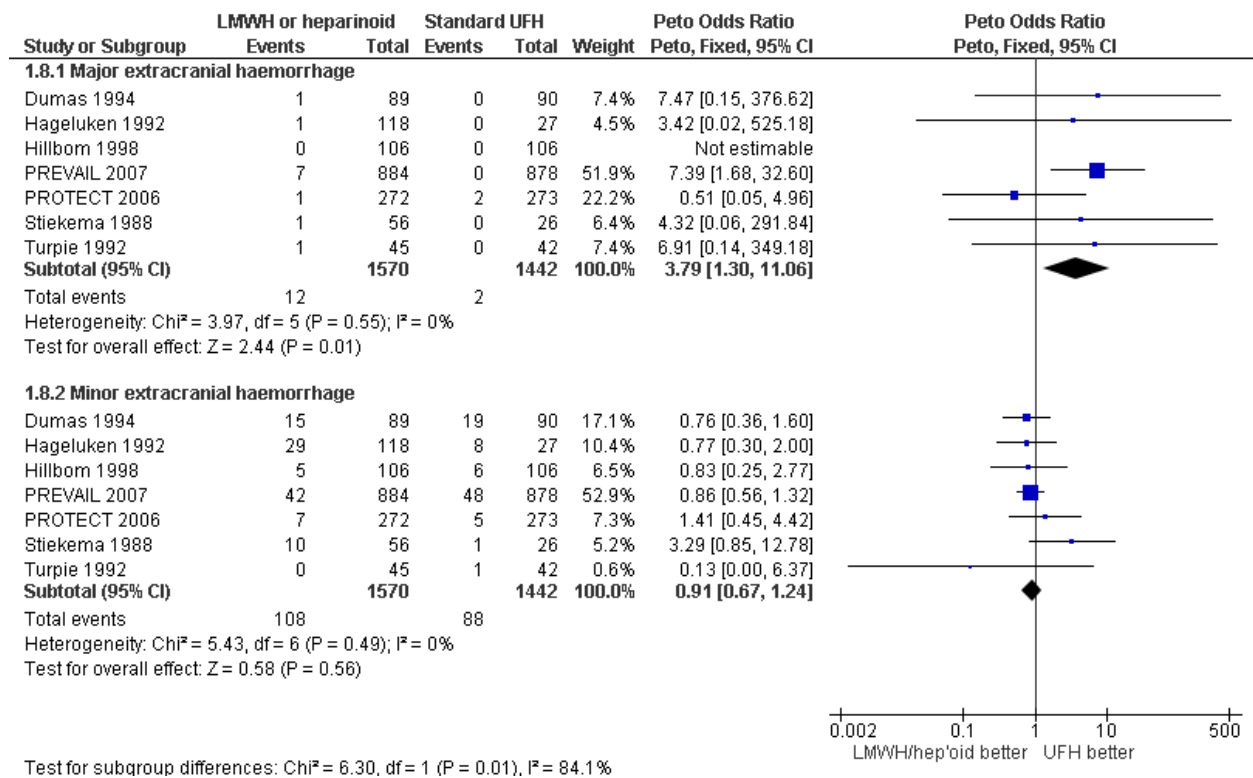

Figure 4.6 The effect of LMWH compared with unfractionated heparin on DVT during follow up

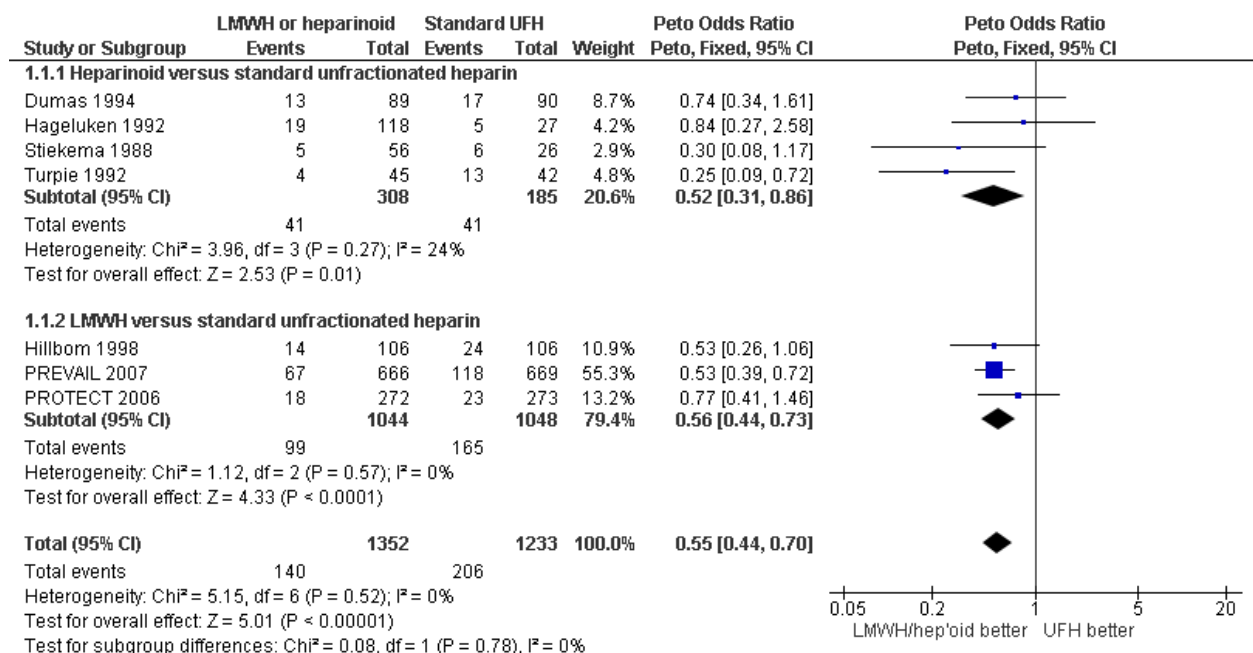

|                        |
|------------------------|
| <b>Evidence tables</b> |
|------------------------|

**Graduated Compression Stockings**

**Summary of included RCTs**

|                                         |                                                                                                                                                                                                                                                                                                                                                                                                                                                                                                                                                                                                                                                                                                                                                                                                                                                                   |
|-----------------------------------------|-------------------------------------------------------------------------------------------------------------------------------------------------------------------------------------------------------------------------------------------------------------------------------------------------------------------------------------------------------------------------------------------------------------------------------------------------------------------------------------------------------------------------------------------------------------------------------------------------------------------------------------------------------------------------------------------------------------------------------------------------------------------------------------------------------------------------------------------------------------------|
| <b>Study reference (name)</b>           | CLOTS 1; Dennis (2009)                                                                                                                                                                                                                                                                                                                                                                                                                                                                                                                                                                                                                                                                                                                                                                                                                                            |
| <b>Methods</b>                          | <b>Multicentre RCT (105 centres in UK with 6 month follow up</b>                                                                                                                                                                                                                                                                                                                                                                                                                                                                                                                                                                                                                                                                                                                                                                                                  |
| <b>Participants or study population</b> | <p>2518 Immobile stroke patients admitted to hospital within 7 days of the stroke and enrolled within 3 days of admission. Losses to follow up: 69 missing data (41 in treatment group and 28 in control group) -<br/> no CDU prior to death or 30 days<br/> DVT diagnosis: CDU (minimum of the popliteal and femoral veins) between day 7 and 10 and between day 25 and 30<br/> Statistical analysis: odds ratio and NNT<br/> Scheduled treatment and follow-up period: 30 days; clinical follow up at 6 months<br/> Age: 76 years (68 to 83) for both groups<br/> Sex: males 49.4% (620/1256) in the treatment group and 49.3% in the control group (622/1262)<br/> Exclusion criteria: peripheral vascular disease, or with diabetic/sensory neuropathy, if clinicians judged GCS could cause skin damage<br/> Full intention-to-treat analysis: performed</p> |
| <b>Intervention &amp; comparator</b>    | <p>Interventions Type: thigh-length Tyco Healthcare TED GCS<br/> Control: 1262, Treatment: 1256<br/> Duration applied: night and day until death/discharge/mobile/refused<br/> Use of anticoagulants post randomisation: group allocated GCS</p> <ul style="list-style-type: none"> <li>• 117 post-randomisation prophylactic dose heparin/LMWH prescribed</li> <li>• 78 post-randomisation treatment dose heparin/LMWH prescribed</li> <li>• 186 post-randomisation warfarin prescribed</li> </ul> <p>Use of anticoagulants post randomisation: group allocated 'avoid GCS'</p> <ul style="list-style-type: none"> <li>• 129 post-randomisation prophylactic dose heparin/LMWH prescribed</li> <li>• 97 post-randomisation treatment dose heparin/LMWH prescribed</li> <li>• 208 post-randomisation warfarin prescribed</li> </ul>                               |
| <b>Outcomes</b>                         | <ul style="list-style-type: none"> <li>• All cause mortality</li> <li>• Disability at 6 month measured with Oxford handicap scale</li> <li>• Pulmonary embolism (confirmed by imaging or autopsy) up to six months</li> <li>• Symptomatic DVT (proximal only and combined distal or proximal) – confirmed mainly with compression duplex ultrasound within 6 months</li> <li>• Skin breaks within 30days</li> <li>• Asymptomatic DVT (proximal only and combined distal or</li> </ul>                                                                                                                                                                                                                                                                                                                                                                             |

|              |                                                                                                                                                                                                                                                                                                                                                          |
|--------------|----------------------------------------------------------------------------------------------------------------------------------------------------------------------------------------------------------------------------------------------------------------------------------------------------------------------------------------------------------|
|              | proximal) within 30 days                                                                                                                                                                                                                                                                                                                                 |
| <b>Notes</b> | The primary outcome focused on proximal DVTs (popliteal or femoral) rather than any DVT. Randomising clinicians were allowed to elect prior to randomisation whether patients would have a second CDU at 25 to 30 days. . The median delay from stroke onset to enrolment was 2 days but there was no trend towards more effect with earlier recruitment |

|                            |                                                                   |
|----------------------------|-------------------------------------------------------------------|
| <b>Study: CLOTS 1</b>      | <b>Outcome: Mortality/Survival</b>                                |
| <b>Bias</b>                | No serious                                                        |
| <b>Indirectness</b>        | No serious                                                        |
| <b>Inconsistency</b>       | No serious                                                        |
| <b>Imprecision</b>         | Serious – not powered to examine mortality                        |
| <b>Quality of evidence</b> | <b>Moderate</b>                                                   |
|                            | <b>Outcome: Disability at 6 months</b>                            |
| <b>Bias</b>                | No serious                                                        |
| <b>Indirectness</b>        | No serious                                                        |
| <b>Inconsistency</b>       | No serious                                                        |
| <b>Imprecision</b>         | Serious – not powered to look at disability                       |
| <b>Quality of evidence</b> | <b>Moderate</b>                                                   |
|                            | <b>Outcome: Pulmonary embolism</b>                                |
| <b>Bias</b>                | No serious                                                        |
| <b>Indirectness</b>        | No serious                                                        |
| <b>Inconsistency</b>       | No serious                                                        |
| <b>Imprecision</b>         | Serious – not powered to look at PE                               |
| <b>Quality of evidence</b> | <b>Moderate</b>                                                   |
|                            | <b>Outcome: Symptomatic DVT</b>                                   |
| <b>Bias</b>                | No serious                                                        |
| <b>Indirectness</b>        | No serious                                                        |
| <b>Inconsistency</b>       | No serious                                                        |
| <b>Imprecision</b>         | Serious – not powered to look at symptomatic DVT                  |
| <b>Quality of evidence</b> | <b>Moderate</b>                                                   |
|                            | <b>Outcome: Skin breaks</b>                                       |
| <b>Bias</b>                | Very Serious – based on casenote review by unblinded person       |
| <b>Indirectness</b>        | Serious – little indication of whether breaks associated with IPC |
| <b>Inconsistency</b>       | No serious                                                        |
| <b>Imprecision</b>         | No serious                                                        |
| <b>Quality of evidence</b> | <b>Low</b>                                                        |
|                            | <b>Outcome: All DVT (including asymptomatic)</b>                  |
| <b>Bias</b>                | No serious – mostly asymptomatic , based on blinded imaging       |
| <b>Indirectness</b>        | No serious                                                        |
| <b>Inconsistency</b>       | Serious – I <sup>2</sup> =79% p=0.03, with Muir 2000              |
| <b>Imprecision</b>         | No serious                                                        |
| <b>Quality of evidence</b> | <b>Moderate</b>                                                   |

|                               |                                                                                                                                                                                                                                                                                                          |
|-------------------------------|----------------------------------------------------------------------------------------------------------------------------------------------------------------------------------------------------------------------------------------------------------------------------------------------------------|
| <b>Study reference (name)</b> | <b>Muir 2000</b>                                                                                                                                                                                                                                                                                         |
| <b>Methods</b>                | Single centre RCT in UK<br>Computer generated random numbers in sealed envelopes<br>Exclusion to post-randomisation: 1<br>Losses to follow up: 19<br>DVT diagnosis: CDU at enrolment and at day 7 ± 2<br>Statistical analysis: odds ratio and NNT<br>Scheduled treatment and follow-up period 7 ± 2 days |



|                                         |                                                                                                                                                                                                                                                                                                                                                                                                         |
|-----------------------------------------|---------------------------------------------------------------------------------------------------------------------------------------------------------------------------------------------------------------------------------------------------------------------------------------------------------------------------------------------------------------------------------------------------------|
| <b>Participants or study population</b> | Total number of participants: 98 (1 missing data)<br>Total available for analysis: 71<br>Age: mean age > 73 years<br>Immobilisation: yes<br>Inclusion criteria: acute stroke within 24 hours<br>Exclusion criteria: patients with coma, life-threatening inter-current illness, critical lower limb ischaemia or severe dermatological conditions<br>Full intention-to-treat analysis was not performed |
| <b>Intervention &amp; comparator</b>    | Interventions Type: GCS thigh-length Kendall TED or Brevett TX brands<br>Control: 32<br>Treatment: TED group 37, TX group 28<br>Duration applied: time of application and duration applied till follow up<br>Compression duplex ultrasound on Day 9                                                                                                                                                     |
| <b>Outcomes</b>                         | Mortality by Stocking: 9/65, Control 4/32 by Day 9<br>Pulmonary embolism – none by day 9<br>Symptomatic DVT – 1 but group not stated<br>DVT detected on compression duplex ultrasound – all but one was asymptomatic<br>Stockings: 7/65, Control: 7/32 – but some were present prior to randomisation. Only 1/65 and 4/32 occurred after treatment                                                      |
| <b>Notes</b>                            | Notes TX and TED groups were combined for analysis of efficacy. Some data reported in the results do not correspond to data reported in tables<br>Did not report if ischaemic or haemorrhagic strokes                                                                                                                                                                                                   |

|                            |                                                                               |
|----------------------------|-------------------------------------------------------------------------------|
| <b>Study: Muir 2000</b>    | <b>Outcome: Mortality/Survival</b>                                            |
| <b>Bias</b>                | No serious                                                                    |
| <b>Indirectness</b>        | No serious                                                                    |
| <b>Inconsistency</b>       | No serious                                                                    |
| <b>Imprecision</b>         | Very serious – very small numbers                                             |
| <b>Quality of evidence</b> | <b>Low</b>                                                                    |
|                            | <b>Outcome: All DVT (including asymptomatic)</b>                              |
| <b>Bias</b>                | Serious – lots of patients excluded from analyses because had DVT at baseline |
| <b>Indirectness</b>        | No serious                                                                    |
| <b>Inconsistency</b>       | Serious – $I^2=79%$ $p=0.03$ , with CLOTS 1                                   |
| <b>Imprecision</b>         | Serious – very small numbers                                                  |
| <b>Quality of evidence</b> | <b>Low</b>                                                                    |

## Intermittent Pneumatic Compression

### Included RCTs

|                               |                                                                                                                                                                            |
|-------------------------------|----------------------------------------------------------------------------------------------------------------------------------------------------------------------------|
| <b>Study reference (name)</b> | CLOTS 3; Dennis (2013) Dennis (2014)                                                                                                                                       |
| <b>Methods</b>                | <b>Multicentre RCT (105 centres in UK with 6 month follow up</b><br>Central web based minimisation system<br>Blinding described: blinded assessment of primary outcome and |

|                                                                                | <p>six month outcomes but not secondary outcomes at 30 days (fractures, skins breaks, symptomatic DVT, PE)</p>                                                                                                                                                                                                                                                                                                                                                                                                                                                                                                                                                                                                                                                                                                                                                                                                                                                                                                                                                                                                                                                                                                                                                                                                                                                                                                                                                                                                   |                                              |                     |                        |                         |  |  |                            |         |         |                           |         |         |                                                               |           |           |                                       |           |           |                                           |  |  |                                                                                |           |           |                                                                             |           |           |                                           |          |         |
|--------------------------------------------------------------------------------|------------------------------------------------------------------------------------------------------------------------------------------------------------------------------------------------------------------------------------------------------------------------------------------------------------------------------------------------------------------------------------------------------------------------------------------------------------------------------------------------------------------------------------------------------------------------------------------------------------------------------------------------------------------------------------------------------------------------------------------------------------------------------------------------------------------------------------------------------------------------------------------------------------------------------------------------------------------------------------------------------------------------------------------------------------------------------------------------------------------------------------------------------------------------------------------------------------------------------------------------------------------------------------------------------------------------------------------------------------------------------------------------------------------------------------------------------------------------------------------------------------------|----------------------------------------------|---------------------|------------------------|-------------------------|--|--|----------------------------|---------|---------|---------------------------|---------|---------|---------------------------------------------------------------|-----------|-----------|---------------------------------------|-----------|-----------|-------------------------------------------|--|--|--------------------------------------------------------------------------------|-----------|-----------|-----------------------------------------------------------------------------|-----------|-----------|-------------------------------------------|----------|---------|
| <b>Participants or study population</b>                                        | <p><b>2876 Immobile stroke patients admitted to hospital within 3 days of the stroke and enrolled within 3 days of admission.</b></p> <p>Mean age: 74yrs;</p> <p><b>Attrition:</b></p> <p>Loss for primary outcome analysis (intention-to-treat): IPC = 1.7% missing, 10.2% dead; No IPC = 1.2% missing, 12.2% dead</p> <p>1.5% loss to follow-up for 6m outcomes plus 24% who had died by 6 months – no differential attrition rates</p>                                                                                                                                                                                                                                                                                                                                                                                                                                                                                                                                                                                                                                                                                                                                                                                                                                                                                                                                                                                                                                                                        |                                              |                     |                        |                         |  |  |                            |         |         |                           |         |         |                                                               |           |           |                                       |           |           |                                           |  |  |                                                                                |           |           |                                                                             |           |           |                                           |          |         |
| <b>Intervention &amp; comparator</b>                                           | <p>IPC vs No IPC; Thigh-length bilateral IPC delivering sequential pressure; worn 24hrs per day over 30 days (or until mobile or discharged)</p> <p>Background use of aspirin and some heparin</p> <p>Background pharmacological treatment was similar prior to and following randomisation, but use of anti-embolism stockings was greater in the IPC group during the treatment phase of the trial:</p> <table border="1"> <thead> <tr> <th><b>Background pharmacological treatment:</b></th> <th><b>IPC (n=1438)</b></th> <th><b>No IPC (n=1438)</b></th> </tr> </thead> <tbody> <tr> <td colspan="3"><b>- at recruitment</b></td> </tr> <tr> <td>On warfarin at recruitment</td> <td>25 (2%)</td> <td>29 (2%)</td> </tr> <tr> <td>On heparin at recruitment</td> <td>86 (6%)</td> <td>78 (5%)</td> </tr> <tr> <td>Taken antiplatelet medication in past 24 hours at recruitment</td> <td>970 (67%)</td> <td>971 (68%)</td> </tr> <tr> <td>Received thrombolysis since admission</td> <td>249 (17%)</td> <td>255 (18%)</td> </tr> <tr> <td colspan="3"><b>- during treatment phase (30 days)</b></td> </tr> <tr> <td>Prophylactic dose anticoagulant prescribed (heparin / LMWH) post-randomisation</td> <td>248 (17%)</td> <td>240 (17%)</td> </tr> <tr> <td>Treatment dose anticoagulant prescribed (heparin / LMWH) post-randomisation</td> <td>182 (13%)</td> <td>219 (15%)</td> </tr> <tr> <td>Elastic anti-embolism stockings (ES) worn</td> <td>118 (8%)</td> <td>42 (3%)</td> </tr> </tbody> </table> | <b>Background pharmacological treatment:</b> | <b>IPC (n=1438)</b> | <b>No IPC (n=1438)</b> | <b>- at recruitment</b> |  |  | On warfarin at recruitment | 25 (2%) | 29 (2%) | On heparin at recruitment | 86 (6%) | 78 (5%) | Taken antiplatelet medication in past 24 hours at recruitment | 970 (67%) | 971 (68%) | Received thrombolysis since admission | 249 (17%) | 255 (18%) | <b>- during treatment phase (30 days)</b> |  |  | Prophylactic dose anticoagulant prescribed (heparin / LMWH) post-randomisation | 248 (17%) | 240 (17%) | Treatment dose anticoagulant prescribed (heparin / LMWH) post-randomisation | 182 (13%) | 219 (15%) | Elastic anti-embolism stockings (ES) worn | 118 (8%) | 42 (3%) |
| <b>Background pharmacological treatment:</b>                                   | <b>IPC (n=1438)</b>                                                                                                                                                                                                                                                                                                                                                                                                                                                                                                                                                                                                                                                                                                                                                                                                                                                                                                                                                                                                                                                                                                                                                                                                                                                                                                                                                                                                                                                                                              | <b>No IPC (n=1438)</b>                       |                     |                        |                         |  |  |                            |         |         |                           |         |         |                                                               |           |           |                                       |           |           |                                           |  |  |                                                                                |           |           |                                                                             |           |           |                                           |          |         |
| <b>- at recruitment</b>                                                        |                                                                                                                                                                                                                                                                                                                                                                                                                                                                                                                                                                                                                                                                                                                                                                                                                                                                                                                                                                                                                                                                                                                                                                                                                                                                                                                                                                                                                                                                                                                  |                                              |                     |                        |                         |  |  |                            |         |         |                           |         |         |                                                               |           |           |                                       |           |           |                                           |  |  |                                                                                |           |           |                                                                             |           |           |                                           |          |         |
| On warfarin at recruitment                                                     | 25 (2%)                                                                                                                                                                                                                                                                                                                                                                                                                                                                                                                                                                                                                                                                                                                                                                                                                                                                                                                                                                                                                                                                                                                                                                                                                                                                                                                                                                                                                                                                                                          | 29 (2%)                                      |                     |                        |                         |  |  |                            |         |         |                           |         |         |                                                               |           |           |                                       |           |           |                                           |  |  |                                                                                |           |           |                                                                             |           |           |                                           |          |         |
| On heparin at recruitment                                                      | 86 (6%)                                                                                                                                                                                                                                                                                                                                                                                                                                                                                                                                                                                                                                                                                                                                                                                                                                                                                                                                                                                                                                                                                                                                                                                                                                                                                                                                                                                                                                                                                                          | 78 (5%)                                      |                     |                        |                         |  |  |                            |         |         |                           |         |         |                                                               |           |           |                                       |           |           |                                           |  |  |                                                                                |           |           |                                                                             |           |           |                                           |          |         |
| Taken antiplatelet medication in past 24 hours at recruitment                  | 970 (67%)                                                                                                                                                                                                                                                                                                                                                                                                                                                                                                                                                                                                                                                                                                                                                                                                                                                                                                                                                                                                                                                                                                                                                                                                                                                                                                                                                                                                                                                                                                        | 971 (68%)                                    |                     |                        |                         |  |  |                            |         |         |                           |         |         |                                                               |           |           |                                       |           |           |                                           |  |  |                                                                                |           |           |                                                                             |           |           |                                           |          |         |
| Received thrombolysis since admission                                          | 249 (17%)                                                                                                                                                                                                                                                                                                                                                                                                                                                                                                                                                                                                                                                                                                                                                                                                                                                                                                                                                                                                                                                                                                                                                                                                                                                                                                                                                                                                                                                                                                        | 255 (18%)                                    |                     |                        |                         |  |  |                            |         |         |                           |         |         |                                                               |           |           |                                       |           |           |                                           |  |  |                                                                                |           |           |                                                                             |           |           |                                           |          |         |
| <b>- during treatment phase (30 days)</b>                                      |                                                                                                                                                                                                                                                                                                                                                                                                                                                                                                                                                                                                                                                                                                                                                                                                                                                                                                                                                                                                                                                                                                                                                                                                                                                                                                                                                                                                                                                                                                                  |                                              |                     |                        |                         |  |  |                            |         |         |                           |         |         |                                                               |           |           |                                       |           |           |                                           |  |  |                                                                                |           |           |                                                                             |           |           |                                           |          |         |
| Prophylactic dose anticoagulant prescribed (heparin / LMWH) post-randomisation | 248 (17%)                                                                                                                                                                                                                                                                                                                                                                                                                                                                                                                                                                                                                                                                                                                                                                                                                                                                                                                                                                                                                                                                                                                                                                                                                                                                                                                                                                                                                                                                                                        | 240 (17%)                                    |                     |                        |                         |  |  |                            |         |         |                           |         |         |                                                               |           |           |                                       |           |           |                                           |  |  |                                                                                |           |           |                                                                             |           |           |                                           |          |         |
| Treatment dose anticoagulant prescribed (heparin / LMWH) post-randomisation    | 182 (13%)                                                                                                                                                                                                                                                                                                                                                                                                                                                                                                                                                                                                                                                                                                                                                                                                                                                                                                                                                                                                                                                                                                                                                                                                                                                                                                                                                                                                                                                                                                        | 219 (15%)                                    |                     |                        |                         |  |  |                            |         |         |                           |         |         |                                                               |           |           |                                       |           |           |                                           |  |  |                                                                                |           |           |                                                                             |           |           |                                           |          |         |
| Elastic anti-embolism stockings (ES) worn                                      | 118 (8%)                                                                                                                                                                                                                                                                                                                                                                                                                                                                                                                                                                                                                                                                                                                                                                                                                                                                                                                                                                                                                                                                                                                                                                                                                                                                                                                                                                                                                                                                                                         | 42 (3%)                                      |                     |                        |                         |  |  |                            |         |         |                           |         |         |                                                               |           |           |                                       |           |           |                                           |  |  |                                                                                |           |           |                                                                             |           |           |                                           |          |         |
| <b>Outcomes</b>                                                                | <p>Primary outcome was any proximal DVT within 30days of randomisation. Secondary outcomes included:</p> <ul style="list-style-type: none"> <li>• All cause mortality and survival to final follow up at about six months</li> <li>• Disability at 6 month (Oxford handicap scale)</li> <li>• Pulmonary embolism (confirmed by imaging or autopsy) to 6 months</li> <li>• Symptomatic DVT (proximal only and combined distal or proximal) to six months</li> </ul>                                                                                                                                                                                                                                                                                                                                                                                                                                                                                                                                                                                                                                                                                                                                                                                                                                                                                                                                                                                                                                               |                                              |                     |                        |                         |  |  |                            |         |         |                           |         |         |                                                               |           |           |                                       |           |           |                                           |  |  |                                                                                |           |           |                                                                             |           |           |                                           |          |         |

|              |                                                                                                                                                                                                                                                |
|--------------|------------------------------------------------------------------------------------------------------------------------------------------------------------------------------------------------------------------------------------------------|
|              | <ul style="list-style-type: none"> <li>• Fractures for 30 days</li> <li>• Skin breaks for 30 days</li> <li>• Asymptomatic DVT (proximal only and combined distal or proximal) for 30 days detected by compression duplex ultrasound</li> </ul> |
| <b>Notes</b> | Included ICH but subgroup analysis by stroke pathology for primary outcome<br>Funded by CSO and HTA                                                                                                                                            |

|                            |                                                                                                                                                  |
|----------------------------|--------------------------------------------------------------------------------------------------------------------------------------------------|
| <b>Study: CLOTS 3</b>      | <b>Outcome: Mortality/Survival</b>                                                                                                               |
| <b>Bias</b>                | No serious – although patients and healthcare staff not blinded                                                                                  |
| <b>Indirectness</b>        | No serious – although minority of patients had haemorrhagic stroke                                                                               |
| <b>Inconsistency</b>       | No serious                                                                                                                                       |
| <b>Imprecision</b>         | Serious – not powered to detect survival benefit                                                                                                 |
| <b>Quality of evidence</b> | <b>Moderate</b> – a survival analysis demonstrated an effect of IPC (p=0.045) although diff of proportion dead at 6 months did not reach p<0.05. |
|                            | <b>Outcome: Disability at 6 months</b>                                                                                                           |
| <b>Bias</b>                | No serious                                                                                                                                       |
| <b>Indirectness</b>        | No serious although minority of patients had haemorrhagic stroke                                                                                 |
| <b>Inconsistency</b>       | No serious                                                                                                                                       |
| <b>Imprecision</b>         | Serious – although not powered to detect difference in OHS                                                                                       |
| <b>Quality of evidence</b> | <b>Moderate</b>                                                                                                                                  |
|                            | <b>Outcome: Pulmonary embolism</b>                                                                                                               |
| <b>Bias</b>                | No serious                                                                                                                                       |
| <b>Indirectness</b>        | No serious although minority of patients had haemorrhagic stroke                                                                                 |
| <b>Inconsistency</b>       | No serious                                                                                                                                       |
| <b>Imprecision</b>         | <b>Serious</b> because very few events, and low autopsy rate                                                                                     |
| <b>Quality of evidence</b> | <b>Moderate</b>                                                                                                                                  |
|                            | <b>Outcome: Symptomatic DVT</b>                                                                                                                  |
| <b>Bias</b>                | Serious because patient/ healthcare workers unblinded                                                                                            |
| <b>Indirectness</b>        | No serious although minority of patients had haemorrhagic stroke                                                                                 |
| <b>Inconsistency</b>       | No serious                                                                                                                                       |
| <b>Imprecision</b>         | Serious – not powered to detect symptomatic DVT                                                                                                  |
| <b>Quality of evidence</b> | <b>Low</b>                                                                                                                                       |
|                            | <b>Outcome: Fractures</b>                                                                                                                        |
| <b>Bias</b>                | No serious – objective measure                                                                                                                   |
| <b>Indirectness</b>        | No serious although minority of patients had haemorrhagic stroke                                                                                 |
| <b>Inconsistency</b>       | Serious – not powered to detect difference                                                                                                       |
| <b>Imprecision</b>         | <b>Moderate</b>                                                                                                                                  |
|                            | <b>Outcome: Skin breaks</b>                                                                                                                      |
| <b>Bias</b>                | Very Serious – based on casenote review by unblinded person                                                                                      |
| <b>Indirectness</b>        | Serious – little indication of whether breaks associated with IPC                                                                                |
| <b>Inconsistency</b>       | No serious                                                                                                                                       |
| <b>Imprecision</b>         | No serious                                                                                                                                       |
| <b>Quality of evidence</b> | <b>Low</b>                                                                                                                                       |

|                                         |                                                                                                                                                                                                                                                                                                                                        |
|-----------------------------------------|----------------------------------------------------------------------------------------------------------------------------------------------------------------------------------------------------------------------------------------------------------------------------------------------------------------------------------------|
|                                         | Outcome: All DVT (including asymptomatic)                                                                                                                                                                                                                                                                                              |
| <b>Bias</b>                             | No serious – mostly asymptomatic , based on blinded imaging                                                                                                                                                                                                                                                                            |
| <b>Indirectness</b>                     | No serious                                                                                                                                                                                                                                                                                                                             |
| <b>Inconsistency</b>                    | No serious                                                                                                                                                                                                                                                                                                                             |
| <b>Imprecision</b>                      | No serious                                                                                                                                                                                                                                                                                                                             |
| <b>Quality of evidence</b>              | <b>High</b>                                                                                                                                                                                                                                                                                                                            |
| <b>Study reference (name)</b>           | Prasad (1982) <sup>1</sup>                                                                                                                                                                                                                                                                                                             |
| <b>Methods</b>                          | Single centre RCT in UK<br>Method of randomisation unclear<br>Blinding not stated                                                                                                                                                                                                                                                      |
| <b>Participants or study population</b> | 26 hospitalised stroke patients (excluding coma); within 72 hours of having acute stroke; weakness of up to 2/6 motor power in one or both limbs. Level of mobility not stated<br>Mean age: 79yrs;                                                                                                                                     |
| <b>Intervention &amp; comparator</b>    | IPC vs No IPC<br>Calf-length IPC delivering circumferential compression; worn bilaterally, continuously for first 24hrs then 3x 3hrs per day over 9 days.                                                                                                                                                                              |
| <b>Outcomes</b>                         | <ul style="list-style-type: none"> <li>• All cause mortality by day 10- IPC 2/13, Control 0/13</li> <li>• Any DVT (symptomatic and asymptomatic , proximal and distal combined) measured with radiolabelled fibrinogen only to 10 days–IPC 6/13, Control 6/13. one symptomatic DVT but not stated in which treatment group.</li> </ul> |
| <b>Notes</b>                            | Type of stroke not reported                                                                                                                                                                                                                                                                                                            |

|                            |                                                                  |
|----------------------------|------------------------------------------------------------------|
| <b>Study: Prasad 1982</b>  | <b>Outcome: Mortality/Survival</b>                               |
| <b>Bias</b>                | Serious – methods of randomisation not described and no blinding |
| <b>Indirectness</b>        | No serious                                                       |
| <b>Inconsistency</b>       | No serious                                                       |
| <b>Imprecision</b>         | Very serious – not powered                                       |
| <b>Quality of evidence</b> | <b>Low</b>                                                       |
|                            | <b>Outcome: All DVT (including asymptomatic)</b>                 |
| <b>Bias</b>                | Serious – methods of randomisation not described and no blinding |
| <b>Indirectness</b>        | Serious - Only Isotope scanning for DVT                          |
| <b>Inconsistency</b>       | <b>No serious</b>                                                |
| <b>Imprecision</b>         | Very serious – not powered                                       |
| <b>Quality of evidence</b> | <b>Low</b>                                                       |

|                                         |                                                                                                                                   |
|-----------------------------------------|-----------------------------------------------------------------------------------------------------------------------------------|
| <b>Study reference (name)</b>           | <b>Spinelli 2006</b>                                                                                                              |
| <b>Methods</b>                          | Single centre RCT in Italy<br>Method of randomisation unclear<br>Blinding not stated                                              |
| <b>Participants or study population</b> | 100 hospitalised stroke patients ; within 48 hours of having acute stroke; weakness in leg <4/5.<br>ICH excluded by brain imaging |

<sup>1</sup> Only mortality data are included in outcome analyses because separate data for symptomatic and asymptomatic DVT are not reported.

|                                      |                                                                                                   |
|--------------------------------------|---------------------------------------------------------------------------------------------------|
|                                      | Excluded those with CI to anticoagulation and leg wounds<br>Median age: 80years, Male 35%         |
| <b>Intervention &amp; comparator</b> | IPC plus LMWH vs No IPC plus LMWH<br>Calf-length IPC Venaflo® (AIRCAST) devices worn bilaterally, |
| <b>Outcomes</b>                      | All cause mortality in hospital<br>Symptomatic DVT – but method of confirming DVT unclear         |
| <b>Notes</b>                         | Results only in abstract and poster                                                               |

|                             |                                                                                               |
|-----------------------------|-----------------------------------------------------------------------------------------------|
| <b>Study: Spinelli 2006</b> | <b>Outcome: Mortality/Survival</b>                                                            |
| <b>Bias</b>                 | Serious – methods of randomisation not described and no blinding. Follow up to discharge only |
| <b>Indirectness</b>         | No serious                                                                                    |
| <b>Inconsistency</b>        | No serious                                                                                    |
| <b>Imprecision</b>          | Serious – not powered to identify an effect for this outcome                                  |
| <b>Quality of evidence</b>  | <b>Low</b>                                                                                    |
|                             | <b>Outcome: All DVT (including asymptomatic)</b>                                              |
| <b>Bias</b>                 | Serious – methods of randomisation not described and no blinding                              |
| <b>Indirectness</b>         | No serious                                                                                    |
| <b>Inconsistency</b>        | No serious                                                                                    |
| <b>Imprecision</b>          | Serious – not powered to identify an effect for this outcome                                  |
| <b>Quality of evidence</b>  | <b>Low</b>                                                                                    |

## Anticoagulation (regimes aimed at VTE prophylaxis?)

### Included RCTS

|                                         |                                                                                                                                                                                                            |
|-----------------------------------------|------------------------------------------------------------------------------------------------------------------------------------------------------------------------------------------------------------|
| <b>Study reference (name)</b>           | <b>Chaudhary 2002</b>                                                                                                                                                                                      |
| <b>Methods</b>                          | Randomisation not described<br>Placebo controlled<br>Exclusions during trial: none<br>Losses to FU: none                                                                                                   |
| <b>Participants or study population</b> | India, 30 participants, Age ~58yrs<br>100% CT before entry<br>Ischaemic stroke - time not otherwise defined – enrolled within 24 hours. Background treatment with aspirin, steroids, mannitol and glycerol |
| <b>Intervention &amp; comparator</b>    | Rx: parnaparin 0.3 ml sc bid for 10 days versus placebo                                                                                                                                                    |
| <b>Outcomes</b>                         | Neurological score at 10 days, Death and Barthel Index at 3 months. Significant improvement in neurological score at 10 days with LMWH                                                                     |
| <b>Notes</b>                            | Excluded: CT with ICH, coagulopathy                                                                                                                                                                        |

|                            |                                        |
|----------------------------|----------------------------------------|
| <b>Study:</b>              | <b>Outcome: Mortality/Survival</b>     |
| <b>Bias</b>                | No serious                             |
| <b>Indirectness</b>        | No serious                             |
| <b>Inconsistency</b>       | No serious                             |
| <b>Imprecision</b>         | Serious – very small numbers           |
| <b>Quality of evidence</b> | <b>Moderate</b>                        |
|                            | <b>Outcome: Disability at 6 months</b> |
| <b>Bias</b>                | No serious                             |
| <b>Indirectness</b>        | No serious                             |
| <b>Inconsistency</b>       | No Serious                             |
| <b>Imprecision</b>         | Serious – very small numbers           |
| <b>Quality of evidence</b> | <b>Moderate</b>                        |

|                                         |                                                                                                                                                                                                                                                         |
|-----------------------------------------|---------------------------------------------------------------------------------------------------------------------------------------------------------------------------------------------------------------------------------------------------------|
| <b>Study reference (name)</b>           | <b>Duke 1983</b>                                                                                                                                                                                                                                        |
| <b>Methods</b>                          | Random number list controlled by pharmacy<br>Doctor, patient, and assessor blind<br>Exclusions during trial: none<br>Losses to FU: none                                                                                                                 |
| <b>Participants or study population</b> | Canada – two hospitals<br>65 participants<br>? age, ? sex<br>81% CT before entry<br>'Partial stable' ischaemic stroke < 48 hours since stroke onset                                                                                                     |
| <b>Intervention &amp; comparator</b>    | Rx: heparin 5000 IU sc 8 hourly<br>Control: placebo<br>Duration: 7 days                                                                                                                                                                                 |
| <b>Outcomes</b>                         | Death – but not reported in the 65 enrolled in this arm<br>DVT (systematic I-125 scan)<br>Intracranial haemorrhage (symptomatic) – none reported<br>Extracranial haemorrhage – none reported<br><br>Disability at 3 and 12 months – not reported for 65 |
| <b>Notes</b>                            | Ex: BP > 120 diastolic, bleeding risk<br>FU: 1 year                                                                                                                                                                                                     |

|                                         |                                                                                                                                                                 |
|-----------------------------------------|-----------------------------------------------------------------------------------------------------------------------------------------------------------------|
|                                         | <b>Outcome: All DVT (including asymptomatic)</b>                                                                                                                |
| <b>Bias</b>                             | No serious                                                                                                                                                      |
| <b>Indirectness</b>                     | Serious - Only Isotope scanning for DVT                                                                                                                         |
| <b>Inconsistency</b>                    | Serious – significant heterogeneity between trials                                                                                                              |
| <b>Imprecision</b>                      | Serious – small numbers                                                                                                                                         |
| <b>Quality of evidence</b>              | <b>Low</b>                                                                                                                                                      |
|                                         |                                                                                                                                                                 |
| <b>Study reference (name)</b>           | <b>Elias 1990</b>                                                                                                                                               |
| <b>Methods</b>                          | Sealed envelopes (? opaque and sequentially numbered)<br>Non-blind<br>Exclusions during trial: none<br>Losses to FU: 2 in Rx group                              |
| <b>Participants or study population</b> | Europe<br>30 participants<br>Mean age 68 years<br>57% male<br>100% CT before entry<br>Ischaemic stroke with immobility<br>Less than 48 hours since stroke onset |
| <b>Intervention &amp; comparator</b>    | Rx: CY 222 (LMWH) 15,000 anti-Xa units sc 24 hourly<br>Control: no treatment<br>Duration: 14 days                                                               |
| <b>Outcomes</b>                         | Death plus cause of death<br>DVT (systematic I-125 scan, confirmed on venography)<br>Major extracranial haemorrhage                                             |
| <b>Notes</b>                            | Ex: BP > 220/120, coma<br>FU: 14 days                                                                                                                           |

|                      |                                    |
|----------------------|------------------------------------|
| <b>Study:</b>        | <b>Outcome: Mortality/Survival</b> |
| <b>Bias</b>          | No serious                         |
| <b>Indirectness</b>  | No serious                         |
| <b>Inconsistency</b> | No serious                         |

|                            |                                                      |
|----------------------------|------------------------------------------------------|
| <b>Imprecision</b>         | Serious – very small numbers                         |
| <b>Quality of evidence</b> | <b>Moderate</b>                                      |
|                            | <b>Outcome: Symptomatic DVT</b>                      |
| <b>Bias</b>                | No serious                                           |
| <b>Indirectness</b>        | No serious                                           |
| <b>Inconsistency</b>       | No serious                                           |
| <b>Imprecision</b>         | Serious – very small numbers                         |
| <b>Quality of evidence</b> | <b>Moderate</b>                                      |
|                            | <b>Outcome: All DVT (including asymptomatic)</b>     |
| <b>Bias</b>                | No serious                                           |
| <b>Indirectness</b>        | No serious – DVT on isotope were confirmed on Duplex |
| <b>Inconsistency</b>       | Serious – significant heterogeneity between trials   |
| <b>Imprecision</b>         | Serious – very small numbers                         |
| <b>Quality of evidence</b> | <b>Low</b>                                           |

|                                         |                                                                                                                                                                                                                                                                                        |
|-----------------------------------------|----------------------------------------------------------------------------------------------------------------------------------------------------------------------------------------------------------------------------------------------------------------------------------------|
| <b>Study reference (name)</b>           | <b>FISS 1995</b>                                                                                                                                                                                                                                                                       |
| <b>Methods</b>                          | Sequentially numbered boxes containing identical syringes<br>Doctor, patient, and assessor blind<br>Exclusions during trial: 4 in Rx group (survival status known for all except one)<br>Losses to FU: 2 in Rx group                                                                   |
| <b>Participants or study population</b> | Hong Kong<br>312 participants<br>Mean age 67 years<br>58% male<br>100% CT before entry<br>Ischaemic stroke with motor deficit<br>Less than 48 hours since stroke onset                                                                                                                 |
| <b>Intervention &amp; comparator</b>    | Rx: nadroparin (LMWH) sc (randomised between 4100 anti-Xa units 12 hourly versus 24 hourly)<br>Control: placebo<br>Duration: 10 days<br>All surviving participants received aspirin 100 mg/day after 10 days                                                                           |
| <b>Outcomes</b>                         | Death plus cause of death<br>Functional outcome (dependency assessed using International Stroke Trial simple questions)<br>PE (symptomatic)<br>Intracranial haemorrhage (symptomatic and systematic CT)<br>Recurrent stroke<br>Major extracranial haemorrhage<br>Myocardial infarction |
| <b>Notes</b>                            | Ex: over 80 years, BP > 180/120 mmHg, previous disabling stroke, bleeding risk, imminent death<br>FU: 6 months                                                                                                                                                                         |

|                            |                                        |
|----------------------------|----------------------------------------|
| <b>Study:</b>              | <b>Outcome: Mortality/Survival</b>     |
| <b>Bias</b>                | No serious                             |
| <b>Indirectness</b>        | No serious                             |
| <b>Inconsistency</b>       | No serious                             |
| <b>Imprecision</b>         | Serious – not powered for mortality    |
| <b>Quality of evidence</b> | <b>Moderate</b>                        |
|                            | <b>Outcome: Disability at 6 months</b> |
| <b>Bias</b>                | No serious                             |
| <b>Indirectness</b>        | No serious                             |



|                                         |                                                                                                                                                                      |
|-----------------------------------------|----------------------------------------------------------------------------------------------------------------------------------------------------------------------|
| <b>Inconsistency</b>                    | No serious                                                                                                                                                           |
| <b>Imprecision</b>                      | No serious                                                                                                                                                           |
| <b>Quality of evidence</b>              | <b>High</b>                                                                                                                                                          |
|                                         | <b>Outcome: Recurrent stroke</b>                                                                                                                                     |
| <b>Bias</b>                             | No serious                                                                                                                                                           |
| <b>Indirectness</b>                     | No serious                                                                                                                                                           |
| <b>Inconsistency</b>                    | No serious                                                                                                                                                           |
| <b>Imprecision</b>                      | Serious – not powered to detect recurrent stroke                                                                                                                     |
| <b>Quality of evidence</b>              | <b>Moderate</b>                                                                                                                                                      |
|                                         | <b>Outcome: Pulmonary embolism</b>                                                                                                                                   |
| <b>Bias</b>                             | No serious                                                                                                                                                           |
| <b>Indirectness</b>                     | Serious – included mobile patients                                                                                                                                   |
| <b>Inconsistency</b>                    | No serious                                                                                                                                                           |
| <b>Imprecision</b>                      | Serious – not powered to detect PE                                                                                                                                   |
| <b>Quality of evidence</b>              | <b>Low</b>                                                                                                                                                           |
|                                         | <b>Outcome: Major bleeding</b>                                                                                                                                       |
| <b>Bias</b>                             | No serious                                                                                                                                                           |
| <b>Indirectness</b>                     | No serious                                                                                                                                                           |
| <b>Inconsistency</b>                    | No serious                                                                                                                                                           |
| <b>Imprecision</b>                      | Serious – not powered to detect major bleeding                                                                                                                       |
| <b>Quality of evidence</b>              | <b>Moderate</b>                                                                                                                                                      |
|                                         | <b>Outcome: Minor bleeding</b>                                                                                                                                       |
| <b>Bias</b>                             | No serious                                                                                                                                                           |
| <b>Indirectness</b>                     | No serious                                                                                                                                                           |
| <b>Inconsistency</b>                    | No serious                                                                                                                                                           |
| <b>Imprecision</b>                      | No serious                                                                                                                                                           |
| <b>Quality of evidence</b>              | <b>High</b>                                                                                                                                                          |
|                                         |                                                                                                                                                                      |
| <b>Study reference (name)</b>           | <b>FISS BIS</b>                                                                                                                                                      |
| <b>Methods</b>                          | Sequentially numbered boxes<br>Doctor, patient and assessor blind<br>Exclusions during trial: unknown<br>Losses to FU: unknown                                       |
| <b>Participants or study population</b> | International<br>766 participants<br>Mean age unknown<br>% male unknown<br>100% CT before entry<br>Ischaemic stroke with motor deficit < 24 hours since stroke onset |
| <b>Intervention &amp; comparator</b>    | Rx: nadroparin (LMWH) 86 units/kg sc once daily versus 86 units/kg sc 12 hourly<br>Control: placebo<br>Duration: 10 days                                             |
| <b>Outcomes</b>                         | Death<br>Functional Outcome (Barthel Index score < 85 = dependent) & IST questions<br>Intracerebral haemorrhage (symptomatic CT)                                     |
| <b>Notes</b>                            | Not reported in full – only abstract, Ex: mild stroke, coma<br>FU: 6 months                                                                                          |

|                     |                                    |
|---------------------|------------------------------------|
| <b>Study:</b>       | <b>Outcome: Mortality/Survival</b> |
| <b>Bias</b>         | No serious                         |
| <b>Indirectness</b> | No serious                         |

|                            |                                                               |
|----------------------------|---------------------------------------------------------------|
| <b>Inconsistency</b>       | No serious                                                    |
| <b>Imprecision</b>         | Serious – not powered to determine survival benefit           |
| <b>Quality of evidence</b> | <b>Moderate</b>                                               |
|                            | <b>Outcome: Disability at 6 months</b>                        |
| <b>Bias</b>                | No serious                                                    |
| <b>Indirectness</b>        | No serious                                                    |
| <b>Inconsistency</b>       | No serious                                                    |
| <b>Imprecision</b>         | No serious                                                    |
| <b>Quality of evidence</b> | <b>High</b>                                                   |
|                            | <b>Outcome: Recurrent stroke</b>                              |
| <b>Bias</b>                | No serious                                                    |
| <b>Indirectness</b>        | No serious                                                    |
| <b>Inconsistency</b>       | No serious                                                    |
| <b>Imprecision</b>         | Serious – not powered to determine effect on recurrent stroke |
| <b>Quality of evidence</b> | <b>Moderate</b>                                               |
|                            | <b>Outcome: Major bleeding</b>                                |
| <b>Bias</b>                | No serious                                                    |
| <b>Indirectness</b>        | No serious                                                    |
| <b>Inconsistency</b>       | No serious                                                    |
| <b>Imprecision</b>         | Serious – not powered to determine effect on recurrent stroke |
| <b>Quality of evidence</b> | Moderate                                                      |

|                                         |                                                                                                                                                                                                                                                                                                                                                                                                  |
|-----------------------------------------|--------------------------------------------------------------------------------------------------------------------------------------------------------------------------------------------------------------------------------------------------------------------------------------------------------------------------------------------------------------------------------------------------|
| <b>Study reference (name)</b>           | <b>IST 1997</b>                                                                                                                                                                                                                                                                                                                                                                                  |
| <b>Methods</b>                          | Telephone randomisation<br>Unblinded; dependency assessment mainly blinded<br>Exclusions during trial: none<br>Losses to FU: data 99.99% complete for 14-day outcome and 99.2% complete for 6-month outcome                                                                                                                                                                                      |
| <b>Participants or study population</b> | International<br>19,435 participants<br>61% > 70 years<br>54% male<br>67% CT prior to randomisation, 29% CT after randomisation<br>Ischaemic stroke < 48 hours since stroke onset                                                                                                                                                                                                                |
| <b>Intervention &amp; comparator</b>    | Rx: sc heparin (5000 IU or 12,500 IU 12 hourly), aspirin 300 mg, both, or neither (factorial design)<br>Duration: 14 days or until discharge from hospital                                                                                                                                                                                                                                       |
| <b>Outcomes</b>                         | Death<br>Functional outcome (validated simple questions)<br>Recurrent stroke<br>PE<br>Intracranial haemorrhage (symptomatic CT)<br>Extracranial haemorrhage                                                                                                                                                                                                                                      |
| <b>Notes</b>                            | Ex: small likelihood of worthwhile benefit; high risk of adverse effect (e.g. hypersensitivity of aspirin, recent GI bleed or peptic ulcer disease, already on long-term anticoagulation)<br>FU: 6 months. For purpose of meta-analysis the outcomes in the 5000IUbd with, or without aspirin groups (n=4860) were compared with the avoid any heparin with, or without, aspirin group (n=9718). |

|                      |                                    |
|----------------------|------------------------------------|
| <b>Study:</b>        | <b>Outcome: Mortality/Survival</b> |
| <b>Bias</b>          | No serious                         |
| <b>Indirectness</b>  | No serious                         |
| <b>Inconsistency</b> | No serious                         |

|                            |                                                    |
|----------------------------|----------------------------------------------------|
| <b>Imprecision</b>         | No serious                                         |
| <b>Quality of evidence</b> | <b>High</b>                                        |
|                            | <b>Outcome: Disability at 6 months</b>             |
| <b>Bias</b>                | No serious                                         |
| <b>Indirectness</b>        | No serious                                         |
| <b>Inconsistency</b>       | No serious                                         |
| <b>Imprecision</b>         | No serious                                         |
| <b>Quality of evidence</b> | <b>High</b>                                        |
|                            | <b>Outcome: Recurrent stroke</b>                   |
| <b>Bias</b>                | Serious – based on note review by unblinded person |
| <b>Indirectness</b>        | No serious                                         |
| <b>Inconsistency</b>       | No serious                                         |
| <b>Imprecision</b>         | No serious                                         |
| <b>Quality of evidence</b> | <b>Moderate</b>                                    |
|                            | <b>Outcome: Pulmonary embolism</b>                 |
| <b>Bias</b>                | Serious – based on note review by unblinded person |
| <b>Indirectness</b>        | No serious                                         |
| <b>Inconsistency</b>       | No serious                                         |
| <b>Imprecision</b>         | Serious – not powered to detect effect on PE       |
| <b>Quality of evidence</b> | <b>Low</b>                                         |
|                            | <b>Outcome: Major bleeding</b>                     |
| <b>Bias</b>                | Serious – based on note review by unblinded person |
| <b>Indirectness</b>        | No serious                                         |
| <b>Inconsistency</b>       | No serious                                         |
| <b>Imprecision</b>         | No serious                                         |
| <b>Quality of evidence</b> | <b>Moderate</b>                                    |

|                                         |                                                                                                                                           |
|-----------------------------------------|-------------------------------------------------------------------------------------------------------------------------------------------|
| <b>Study reference (name)</b>           | <b>Kwiecinski 1995</b>                                                                                                                    |
| <b>Methods</b>                          | Unknown method of randomisation<br>Blinding not stated<br>Exclusions during trial: unknown<br>Losses to FU: unknown                       |
| <b>Participants or study population</b> | Poland<br>120 participants<br>Mean age 57 years<br>65% male<br>100% CT before entry<br>Enrolled less than 48 hours after ischaemic stroke |
| <b>Intervention &amp; comparator</b>    | Rx: fraxparin (LMWH)<br>0.6 ml 12 hourly for one week, then 0.3ml 12 hourly for one week<br>Control: placebo<br>Duration: 14 days         |
| <b>Outcomes</b>                         | Death<br>Functional outcome<br>Intracerebral haemorrhage (symptomatic CT)<br>Symptomatic DVT and PE during treatment period               |
| <b>Notes</b>                            | Only published as an abstract; Ex: > 65 years, comatose, severe comorbidity, uncontrolled hypertension<br>FU: 3 months                    |

|                     |                                          |
|---------------------|------------------------------------------|
| <b>Study:</b>       | <b>Outcome: Mortality/Survival</b>       |
| <b>Bias</b>         | Serious                                  |
| <b>Indirectness</b> | No serious but young and included mobile |

|                            |                                                            |
|----------------------------|------------------------------------------------------------|
| <b>Inconsistency</b>       | No serious                                                 |
| <b>Imprecision</b>         | Serious – not powered to detect effect on survival         |
| <b>Quality of evidence</b> | <b>Low</b>                                                 |
|                            | <b>Outcome: Disability at 6 months</b>                     |
| <b>Bias</b>                | Serious                                                    |
| <b>Indirectness</b>        | No serious but young and included mobile                   |
| <b>Inconsistency</b>       | No serious                                                 |
| <b>Imprecision</b>         | Serious – not powered to detect effect on disability       |
| <b>Quality of evidence</b> | <b>Low</b>                                                 |
|                            | <b>Outcome: Recurrent stroke</b>                           |
| <b>Bias</b>                | Serious                                                    |
| <b>Indirectness</b>        | No serious but young and included mobile                   |
| <b>Inconsistency</b>       | No serious                                                 |
| <b>Imprecision</b>         | Serious – not powered to detect effect on recurrent stroke |
| <b>Quality of evidence</b> | <b>Low</b>                                                 |
|                            | <b>Outcome: Pulmonary embolism</b>                         |
| <b>Bias</b>                | Serious                                                    |
| <b>Indirectness</b>        | No serious but young and included mobile                   |
| <b>Inconsistency</b>       | No serious                                                 |
| <b>Imprecision</b>         | Serious – not powered to detect effect on PE               |
| <b>Quality of evidence</b> | <b>Low</b>                                                 |
|                            | <b>Outcome: Major bleeding</b>                             |
| <b>Bias</b>                | Serious                                                    |
| <b>Indirectness</b>        | No serious but young and included mobile                   |
| <b>Inconsistency</b>       | No serious                                                 |
| <b>Imprecision</b>         | Serious – not powered to detect effect on major bleeds     |
|                            | <b>Outcome: Symptomatic DVT</b>                            |
| <b>Bias</b>                | Serious                                                    |
| <b>Indirectness</b>        | No serious but young and included mobile                   |
| <b>Inconsistency</b>       | No serious                                                 |
| <b>Imprecision</b>         | Serious – not powered to detect effect on survival         |
| <b>Quality of evidence</b> | <b>Low</b>                                                 |

|                                         |                                                                                                                                                                               |
|-----------------------------------------|-------------------------------------------------------------------------------------------------------------------------------------------------------------------------------|
| <b>Study reference (name)</b>           | <b>McCarthy 1977</b>                                                                                                                                                          |
| <b>Methods</b>                          | Sealed envelopes (? opaque and sequentially numbered)<br>only DVT assessment blind<br>Exclusions during trial: none<br>Losses to FU: none                                     |
| <b>Participants or study population</b> | United Kingdom<br>32 participants<br>Mean age 78 years<br>34% male<br>No CT, 100% LP before entry<br>Any stroke with no blood in CSF<br>Less than 48 hours since stroke onset |
| <b>Intervention &amp; comparator</b>    | Rx: heparin 5000 IU sc 8 hourly<br>Control: no treatment<br>Duration: 14 days                                                                                                 |
| <b>Outcomes</b>                         | Death but not cause of death<br>DVT (systematic I-125 scan)                                                                                                                   |
| <b>Notes</b>                            | Ex: BP > 120 diastolic, bleeding risk<br>FU: 1 month                                                                                                                          |

|                            |                                                    |
|----------------------------|----------------------------------------------------|
| <b>Study:</b>              | <b>Outcome: Mortality/Survival</b>                 |
| <b>Bias</b>                | Serious – unclear concealment, open trial          |
| <b>Indirectness</b>        | Serious – ICH not excluded,                        |
| <b>Inconsistency</b>       | Not serious                                        |
| <b>Imprecision</b>         | Serious – very small numbers                       |
| <b>Quality of evidence</b> | <b>Low</b>                                         |
|                            | <b>Outcome: All DVT (including asymptomatic)</b>   |
| <b>Bias</b>                | Serious – unclear concealment, open trial          |
| <b>Indirectness</b>        | Serious – ICH not excluded, Isotope scanning only  |
| <b>Inconsistency</b>       | Serious – significant heterogeneity between trials |
| <b>Imprecision</b>         | No serious – but only because event rate so high   |
| <b>Quality of evidence</b> | <b>Low</b>                                         |

|                                         |                                                                                                                                                                                 |
|-----------------------------------------|---------------------------------------------------------------------------------------------------------------------------------------------------------------------------------|
| <b>Study reference (name)</b>           | <b>McCarthy 1986</b>                                                                                                                                                            |
| <b>Methods</b>                          | Sealed envelopes (? opaque and sequentially numbered)<br>only DVT assessment blind<br>Exclusions during trial: none<br>Losses to FU: none                                       |
| <b>Participants or study population</b> | United Kingdom<br>305 participants<br>Mean age 76 years<br>43% male<br>No CT before entry<br>All strokes (10% haemorrhagic on autopsy)<br>Less than 48 hours since stroke onset |
| <b>Intervention &amp; comparator</b>    | Rx: heparin 5000 IU sc 8 hourly<br>Control: no treatment<br>Duration: 14 days<br>Antiplatelet therapy during follow up not reported                                             |
| <b>Outcomes</b>                         | Death , Death with PE<br>DVT (only systematic I-125 scan)                                                                                                                       |
| <b>Notes</b>                            | Ex: BP > 120 diastolic, bleeding risk<br>FU: 3 months                                                                                                                           |

|                                         |                                                                                                                                                                                      |
|-----------------------------------------|--------------------------------------------------------------------------------------------------------------------------------------------------------------------------------------|
| <b>Study:</b>                           | <b>Outcome: Mortality/Survival</b>                                                                                                                                                   |
| <b>Bias</b>                             | Serious – unclear concealment, open trial                                                                                                                                            |
| <b>Indirectness</b>                     | Serious – ICH not excluded, Isotope scanning only                                                                                                                                    |
| <b>Inconsistency</b>                    | Not Serious                                                                                                                                                                          |
| <b>Imprecision</b>                      | Serious – not powered to detect effect on all cause mortality                                                                                                                        |
| <b>Quality of evidence</b>              | <b>Low</b>                                                                                                                                                                           |
| <b>Study:</b>                           | <b>Outcome: Death with PE</b>                                                                                                                                                        |
| <b>Bias</b>                             | Serious – unclear concealment, open trial                                                                                                                                            |
| <b>Indirectness</b>                     | Serious – ICH not excluded,                                                                                                                                                          |
| <b>Inconsistency</b>                    | Not Serious                                                                                                                                                                          |
| <b>Imprecision</b>                      | Serious – not powered to detect effect on death with PE                                                                                                                              |
| <b>Quality of evidence</b>              | <b>Low</b>                                                                                                                                                                           |
|                                         | <b>Outcome: All DVT (including asymptomatic)</b>                                                                                                                                     |
| <b>Bias</b>                             | Serious – unclear concealment, open trial                                                                                                                                            |
| <b>Indirectness</b>                     | Serious – ICH not excluded, Isotope scanning only                                                                                                                                    |
| <b>Inconsistency</b>                    | Serious – significant heterogeneity between trials                                                                                                                                   |
| <b>Imprecision</b>                      | No serious – but only because event rate so high                                                                                                                                     |
| <b>Quality of evidence</b>              | <b>Low</b>                                                                                                                                                                           |
|                                         |                                                                                                                                                                                      |
| <b>Study reference (name)</b>           | <b>Pince 1981</b>                                                                                                                                                                    |
| <b>Methods</b>                          | Sealed envelopes (? opaque and sequentially numbered)<br>Non-blind<br>Exclusions during trial: Rx 0, control 4 participants (2 with intracranial haemorrhage)<br>Losses to FU: none  |
| <b>Participants or study population</b> | France<br>80 participants<br>30 to 92 years<br>62% male<br>No CT, 100% LP before entry<br>Ischaemic stroke affecting the leg<br>Less than 7 days since stroke onset (89% < 48 hours) |
| <b>Intervention &amp; comparator</b>    | Rx: heparin 5000 IU sc 8 hourly<br>Control: no treatment<br>Duration: 10 days                                                                                                        |
| <b>Outcomes</b>                         | Death but not cause of death<br>DVT (systematic I-125 scan)<br>PE<br>Major extracranial haemorrhage – none reported                                                                  |
| <b>Notes</b>                            | Ex: bleeding risk<br>FU: 10 days                                                                                                                                                     |

|                            |                                       |
|----------------------------|---------------------------------------|
| <b>Study:</b>              | <b>Outcome: Mortality/Survival</b>    |
| <b>Bias</b>                | Serious                               |
| <b>Indirectness</b>        | Serious – ICH not excluded by imaging |
| <b>Inconsistency</b>       | No serious                            |
| <b>Imprecision</b>         | Serious – very small numbers          |
| <b>Quality of evidence</b> | Low                                   |
|                            | <b>Outcome: Pulmonary embolism</b>    |
| <b>Bias</b>                | Serious                               |
| <b>Indirectness</b>        | Serious – ICH not excluded by imaging |
| <b>Inconsistency</b>       | No serious                            |
| <b>Imprecision</b>         | Serious – very small numbers          |

|                                         |                                                                                                                                                                                                                         |
|-----------------------------------------|-------------------------------------------------------------------------------------------------------------------------------------------------------------------------------------------------------------------------|
| <b>Quality of evidence</b>              | Low                                                                                                                                                                                                                     |
|                                         | <b>Outcome: Symptomatic DVT</b>                                                                                                                                                                                         |
| <b>Bias</b>                             | Serious                                                                                                                                                                                                                 |
| <b>Indirectness</b>                     | Serious – ICH not excluded by imaging                                                                                                                                                                                   |
| <b>Inconsistency</b>                    | Serious – significant heterogeneity between trials                                                                                                                                                                      |
| <b>Imprecision</b>                      | Serious – very small numbers                                                                                                                                                                                            |
| <b>Quality of evidence</b>              | Low                                                                                                                                                                                                                     |
|                                         | <b>Outcome: All DVT (including asymptomatic)</b>                                                                                                                                                                        |
| <b>Bias</b>                             | Serious                                                                                                                                                                                                                 |
| <b>Indirectness</b>                     | Serious – ICH not excluded by imaging                                                                                                                                                                                   |
| <b>Inconsistency</b>                    | No serious                                                                                                                                                                                                              |
| <b>Imprecision</b>                      | Serious – very small numbers                                                                                                                                                                                            |
| <b>Quality of evidence</b>              | Low                                                                                                                                                                                                                     |
|                                         |                                                                                                                                                                                                                         |
| <b>Study reference (name)</b>           | <b>Prins 1989</b>                                                                                                                                                                                                       |
| <b>Methods</b>                          | Sequentially numbered identical syringes<br>Double-blind<br>Exclusions during trial: none<br>Losses to FU: none                                                                                                         |
| <b>Participants or study population</b> | Netherlands<br>60 participants<br>78% > 70 years<br>52% male<br>100% CT before entry<br>Ischaemic stroke less than 72 hours since stroke onset                                                                          |
| <b>Intervention &amp; comparator</b>    | Rx: dalteparin (LMWH, Kabi 2165) 2500 anti-Xa units sc 12 hourly<br>Control: placebo<br>Duration: 14 days                                                                                                               |
| <b>Outcomes</b>                         | Death plus cause of death<br>DVT (systematic I-125 scan confirmed with venography but not clear whether all cases)<br>PE<br>Intracranial haemorrhage (symptomatic plus systematic CT)<br>Major extracranial haemorrhage |
| <b>Notes</b>                            | Ex: coma<br>FU: 14 days                                                                                                                                                                                                 |

|                            |                                       |
|----------------------------|---------------------------------------|
| <b>Study:</b>              | <b>Outcome: Mortality/Survival</b>    |
| <b>Bias</b>                | No serious                            |
| <b>Indirectness</b>        | No serious                            |
| <b>Inconsistency</b>       | No serious                            |
| <b>Imprecision</b>         | Serious – very small numbers          |
| <b>Quality of evidence</b> | <b>Moderate</b>                       |
|                            | <b>Outcome: Intracranial bleeding</b> |
| <b>Bias</b>                | No serious                            |
| <b>Indirectness</b>        | No serious                            |
| <b>Inconsistency</b>       | No serious                            |
| <b>Imprecision</b>         | Serious – very small numbers          |
| <b>Quality of evidence</b> | <b>Moderate</b>                       |
|                            | <b>Outcome: Pulmonary embolism</b>    |
| <b>Bias</b>                | No serious                            |
| <b>Indirectness</b>        | No serious                            |
| <b>Inconsistency</b>       | No serious                            |

|                                         |                                                                                                                                                                                                                                                     |
|-----------------------------------------|-----------------------------------------------------------------------------------------------------------------------------------------------------------------------------------------------------------------------------------------------------|
| <b>Imprecision</b>                      | Serious – very small numbers                                                                                                                                                                                                                        |
| <b>Quality of evidence</b>              | <b>Moderate</b>                                                                                                                                                                                                                                     |
|                                         | <b>Outcome: Major bleeding</b>                                                                                                                                                                                                                      |
| <b>Bias</b>                             | No serious                                                                                                                                                                                                                                          |
| <b>Indirectness</b>                     | No serious                                                                                                                                                                                                                                          |
| <b>Inconsistency</b>                    | No serious                                                                                                                                                                                                                                          |
| <b>Imprecision</b>                      | Serious – very small numbers                                                                                                                                                                                                                        |
| <b>Quality of evidence</b>              | <b>Moderate</b>                                                                                                                                                                                                                                     |
|                                         | <b>Outcome: All DVT (including asymptomatic)</b>                                                                                                                                                                                                    |
| <b>Bias</b>                             | No serious                                                                                                                                                                                                                                          |
| <b>Indirectness</b>                     | No serious – but unclear if all DVT confirmed on Venography                                                                                                                                                                                         |
| <b>Inconsistency</b>                    | Serious – significant heterogeneity between trials                                                                                                                                                                                                  |
| <b>Imprecision</b>                      | Serious – very small numbers                                                                                                                                                                                                                        |
| <b>Quality of evidence</b>              | <b>Low</b>                                                                                                                                                                                                                                          |
|                                         |                                                                                                                                                                                                                                                     |
| <b>Study reference (name)</b>           | <b>Sandset 1990</b>                                                                                                                                                                                                                                 |
| <b>Methods</b>                          | Sequentially numbered identical ampoules<br>Doctor, patient and assessor blind<br>Exclusions during trial: none<br>Losses to FU: none                                                                                                               |
| <b>Participants or study population</b> | Norway<br>103 participants<br>47 to 90 years<br>45% male<br>100% CT before entry<br>Non-cardioembolic ischaemic stroke<br>Less than 72 hours since stroke onset                                                                                     |
| <b>Intervention &amp; comparator</b>    | Rx: dalteparin (LMWH, Kabi 2165) 3000 to 5500 anti-Xa U sc 24 hourly<br>Control: placebo<br>Duration: 14 days                                                                                                                                       |
| <b>Outcomes</b>                         | Death plus cause of death<br>DVT (systematic venography or B mode ultrasound)<br>PE (symptomatic plus autopsy in 5/6 deaths) – non fatal Pes not confirmed by imaging<br>Intracranial haemorrhage (systematic CT)<br>Major extracranial haemorrhage |
| <b>Notes</b>                            | Ex: BP > 120 diastolic, coma, bleeding risk<br>FU: 28 days                                                                                                                                                                                          |

|                            |                                     |
|----------------------------|-------------------------------------|
| <b>Study:</b>              | <b>Outcome: Mortality/Survival</b>  |
| <b>Bias</b>                | No serious                          |
| <b>Indirectness</b>        | No serious                          |
| <b>Inconsistency</b>       | No serious                          |
| <b>Imprecision</b>         | Serious – very small numbers        |
| <b>Quality of evidence</b> | Moderate                            |
|                            | <b>Outcome: Intracerebral bleed</b> |
| <b>Bias</b>                | No serious                          |
| <b>Indirectness</b>        | No serious                          |
| <b>Inconsistency</b>       | No serious                          |
| <b>Imprecision</b>         | Serious – very small numbers        |
| <b>Quality of evidence</b> | Moderate                            |
|                            | <b>Outcome: Pulmonary embolism</b>  |
| <b>Bias</b>                | No serious                          |



|                                         |                                                                                                                                                                                                             |
|-----------------------------------------|-------------------------------------------------------------------------------------------------------------------------------------------------------------------------------------------------------------|
| <b>Indirectness</b>                     | No serious                                                                                                                                                                                                  |
| <b>Inconsistency</b>                    | No serious                                                                                                                                                                                                  |
| <b>Imprecision</b>                      | Serious – very small numbers                                                                                                                                                                                |
| <b>Quality of evidence</b>              | Moderate                                                                                                                                                                                                    |
|                                         | <b>Outcome: Major bleeding</b>                                                                                                                                                                              |
| <b>Bias</b>                             | No serious                                                                                                                                                                                                  |
| <b>Indirectness</b>                     | No serious                                                                                                                                                                                                  |
| <b>Inconsistency</b>                    | No serious                                                                                                                                                                                                  |
| <b>Imprecision</b>                      | Serious – very small numbers                                                                                                                                                                                |
| <b>Quality of evidence</b>              | Moderate                                                                                                                                                                                                    |
|                                         | <b>Outcome: Symptomatic DVT</b>                                                                                                                                                                             |
| <b>Bias</b>                             | No serious                                                                                                                                                                                                  |
| <b>Indirectness</b>                     | No serious                                                                                                                                                                                                  |
| <b>Inconsistency</b>                    | No serious                                                                                                                                                                                                  |
| <b>Imprecision</b>                      | Serious – very small numbers                                                                                                                                                                                |
| <b>Quality of evidence</b>              | Moderate                                                                                                                                                                                                    |
|                                         | <b>Outcome: All DVT (including asymptomatic)</b>                                                                                                                                                            |
| <b>Bias</b>                             | No serious                                                                                                                                                                                                  |
| <b>Indirectness</b>                     | No serious                                                                                                                                                                                                  |
| <b>Inconsistency</b>                    | Serious – significant heterogeneity between trials                                                                                                                                                          |
| <b>Imprecision</b>                      | Serious – very small numbers                                                                                                                                                                                |
| <b>Quality of evidence</b>              | Low                                                                                                                                                                                                         |
|                                         |                                                                                                                                                                                                             |
| <b>Study reference (name)</b>           | <b>Turpie 1987</b>                                                                                                                                                                                          |
| <b>Methods</b>                          | Sequentially numbered identical containers<br>Double-blind<br>Exclusions during trial: none<br>Losses to FU: none                                                                                           |
| <b>Participants or study population</b> | Canada<br>75 participants<br>28 to 90 years<br>53% male<br>100% CT before entry<br>Non-cardioembolic ischaemic stroke with immobility<br>Less than 7 days since stroke onset                                |
| <b>Intervention &amp; comparator</b>    | Rx: danaparoid (heparinoid Org 10172) 750 anti-Xa units sc 12 hourly<br>Control: placebo<br>Duration: 14 days or prior discharge<br>Antiplatelet therapy during follow up not reported                      |
| <b>Outcomes</b>                         | Death plus cause of death<br>DVT (systematic I-125 scan + plethysmography with venography)<br>PE (symptomatic)<br>Intracranial haemorrhage (symptomatic CT)<br>Extracranial haemorrhage<br>Recurrent stroke |
| <b>Notes</b>                            | Ex: bleeding risk<br>FU: 3 months                                                                                                                                                                           |

|                      |                                    |
|----------------------|------------------------------------|
| <b>Study:</b>        | <b>Outcome: Mortality/Survival</b> |
| <b>Bias</b>          | No serious                         |
| <b>Indirectness</b>  | No serious                         |
| <b>Inconsistency</b> | No serious                         |
| <b>Imprecision</b>   | Serious - very small numbers       |

|                                         |                                                                                                                                                                                                                                    |
|-----------------------------------------|------------------------------------------------------------------------------------------------------------------------------------------------------------------------------------------------------------------------------------|
| <b>Quality of evidence</b>              | <b>Moderate</b>                                                                                                                                                                                                                    |
|                                         | <b>Outcome: Recurrent stroke</b>                                                                                                                                                                                                   |
| <b>Bias</b>                             | No serious                                                                                                                                                                                                                         |
| <b>Indirectness</b>                     | No serious                                                                                                                                                                                                                         |
| <b>Inconsistency</b>                    | No serious                                                                                                                                                                                                                         |
| <b>Imprecision</b>                      | Serious - very small numbers                                                                                                                                                                                                       |
| <b>Quality of evidence</b>              | <b>Moderate</b>                                                                                                                                                                                                                    |
|                                         | <b>Outcome: Pulmonary embolism</b>                                                                                                                                                                                                 |
| <b>Bias</b>                             | No serious                                                                                                                                                                                                                         |
| <b>Indirectness</b>                     | No serious                                                                                                                                                                                                                         |
| <b>Inconsistency</b>                    | No serious                                                                                                                                                                                                                         |
| <b>Imprecision</b>                      | Serious - very small numbers                                                                                                                                                                                                       |
| <b>Quality of evidence</b>              |                                                                                                                                                                                                                                    |
|                                         | <b>Outcome: Major bleeding</b>                                                                                                                                                                                                     |
| <b>Bias</b>                             | No serious                                                                                                                                                                                                                         |
| <b>Indirectness</b>                     | No serious                                                                                                                                                                                                                         |
| <b>Inconsistency</b>                    | No serious                                                                                                                                                                                                                         |
| <b>Imprecision</b>                      | Serious - very small numbers                                                                                                                                                                                                       |
|                                         | <b>Outcome: Minor bleeding</b>                                                                                                                                                                                                     |
| <b>Bias</b>                             | No serious                                                                                                                                                                                                                         |
| <b>Indirectness</b>                     | No serious                                                                                                                                                                                                                         |
| <b>Inconsistency</b>                    | No serious                                                                                                                                                                                                                         |
| <b>Imprecision</b>                      | Serious - very small numbers                                                                                                                                                                                                       |
| <b>Quality of evidence</b>              | <b>Moderate</b>                                                                                                                                                                                                                    |
|                                         | <b>Outcome: All DVT (including asymptomatic)</b>                                                                                                                                                                                   |
| <b>Bias</b>                             | No serious                                                                                                                                                                                                                         |
| <b>Indirectness</b>                     | No serious                                                                                                                                                                                                                         |
| <b>Inconsistency</b>                    | Serious – significant heterogeneity between trials                                                                                                                                                                                 |
| <b>Imprecision</b>                      | Serious - very small numbers                                                                                                                                                                                                       |
| <b>Quality of evidence</b>              | <b>Low</b>                                                                                                                                                                                                                         |
|                                         |                                                                                                                                                                                                                                    |
| <b>Study reference (name)</b>           | <b>Vissinger 1995</b>                                                                                                                                                                                                              |
| <b>Methods</b>                          | Coded containers administered sequentially to enrolled participants<br>Doctor, patient and assessor blind<br>Exclusions during trial: none<br>Losses to FU: 31/50 participants lost to 6-month follow up                           |
| <b>Participants or study population</b> | Denmark<br>50 participants<br>Mean age 71.8 years<br>58% male<br>66% CT before entry - haemorrhage excluded in remainder by cerebral scintigraphy<br>Non-embolic ischaemic stroke with motor deficit < 24 hours since stroke onset |
| <b>Intervention &amp; comparator</b>    | Rx: tinzaparin (LMWH) 3500 anti-Xa IU sc once daily<br>Control: placebo<br>Duration: 14 days or until full mobilisation                                                                                                            |
| <b>Outcomes</b>                         | Death<br>DVT (venography)<br>PE (symptomatic)                                                                                                                                                                                      |
| <b>Notes</b>                            | Exclusion criteria: < 50 years old, hypertension (BP > 200/120 mmHg), coma, aphasia, bleeding risk, oral anticoagulant                                                                                                             |

|  |                                                                                                               |
|--|---------------------------------------------------------------------------------------------------------------|
|  | treatment, severe hepatic or renal disease, clinical suspicion of DVT or PE<br>FU: 12 to 14 days and 6 months |
|--|---------------------------------------------------------------------------------------------------------------|

|                            |                                                    |
|----------------------------|----------------------------------------------------|
| <b>Study:</b>              | <b>Outcome: Mortality/Survival</b>                 |
| <b>Bias</b>                | No serious                                         |
| <b>Indirectness</b>        | No serious                                         |
| <b>Inconsistency</b>       | No serious                                         |
| <b>Imprecision</b>         | Serious – very small numbers of patients           |
| <b>Quality of evidence</b> | <b>Moderate</b>                                    |
|                            | <b>Outcome: Pulmonary embolism</b>                 |
| <b>Bias</b>                | No serious                                         |
| <b>Indirectness</b>        | No serious                                         |
| <b>Inconsistency</b>       | No serious                                         |
| <b>Imprecision</b>         | Serious – very small numbers of patients           |
| <b>Quality of evidence</b> | <b>Moderate</b>                                    |
|                            | <b>Outcome: All DVT (including asymptomatic)</b>   |
| <b>Bias</b>                | No serious                                         |
| <b>Indirectness</b>        | No serious                                         |
| <b>Inconsistency</b>       | Serious – significant heterogeneity between trials |
| <b>Imprecision</b>         | Serious – very small numbers of patients           |
| <b>Quality of evidence</b> | <b>Low</b>                                         |

#### Included RCTs of UFH vs LMWH or Heparinoids

|                                         |                                                                                                                                                                              |
|-----------------------------------------|------------------------------------------------------------------------------------------------------------------------------------------------------------------------------|
| <b>Study reference (name)</b>           | <b>Dumas 1994</b>                                                                                                                                                            |
| <b>Methods</b>                          | Sealed envelope - Sequentially numbered identical containers<br>Double blind<br>Intention to treat<br>No loss to FU                                                          |
| <b>Participants or study population</b> | Europe<br>76 male, 103 female, mean age 72 years<br>100% CT before entry<br>Ischaemic stroke with leg paresis<br>Less than 72 hours since stroke onset                       |
| <b>Intervention &amp; comparator</b>    | Rx: Org 10172 sc (1250 anti-Xa units 24-hourly)<br>Control: heparin sc (5,000 IU 12-hourly)<br>Duration: 9 to 13 days<br><br>No background use of antiplatelet allowed       |
| <b>Outcomes</b>                         | Death + cause of death<br>DVT (systematic I <sup>125</sup> scan with venography)<br>PE (symptomatic)<br>Intracranial haemorrhage (systematic CT)<br>Extracranial haemorrhage |
| <b>Notes</b>                            | Ex: BP greater than 200/120, bleeding risk<br>FU: 3 months                                                                                                                   |

|                      |                                                 |
|----------------------|-------------------------------------------------|
| <b>Study:</b>        | <b>Outcome: Mortality/Survival</b>              |
| <b>Bias</b>          | No serious                                      |
| <b>Indirectness</b>  | No serious                                      |
| <b>Inconsistency</b> | No serious                                      |
| <b>Imprecision</b>   | Serious – not powered to detect effect on Death |

|                            |                                                          |
|----------------------------|----------------------------------------------------------|
| <b>Quality of evidence</b> | <b>Moderate</b>                                          |
|                            | <b>Outcome: Intracranial haemorrhage</b>                 |
| <b>Bias</b>                | No serious                                               |
| <b>Indirectness</b>        | No serious                                               |
| <b>Inconsistency</b>       | No serious                                               |
| <b>Imprecision</b>         | Serious – not powered to detect effect on stroke         |
| <b>Quality of evidence</b> | <b>Moderate</b>                                          |
|                            | <b>Outcome: Pulmonary embolism</b>                       |
| <b>Bias</b>                | No serious                                               |
| <b>Indirectness</b>        | No serious                                               |
| <b>Inconsistency</b>       | No serious                                               |
| <b>Imprecision</b>         | Serious – not powered to detect effect on PE             |
| <b>Quality of evidence</b> | <b>Moderate</b>                                          |
|                            | <b>Outcome: Extracranial bleeding</b>                    |
| <b>Bias</b>                | No serious                                               |
| <b>Indirectness</b>        | No serious                                               |
| <b>Inconsistency</b>       | No serious                                               |
| <b>Imprecision</b>         | Serious – not powered to detect effect on major bleeding |
| <b>Quality of evidence</b> | <b>Moderate</b>                                          |
|                            | <b>Outcome: All DVT (including asymptomatic)</b>         |
| <b>Bias</b>                | No serious                                               |
| <b>Indirectness</b>        | No serious                                               |
| <b>Inconsistency</b>       | Serious – significant heterogeneity between trials       |
| <b>Imprecision</b>         | No serious                                               |
| <b>Quality of evidence</b> | <b>Moderate</b>                                          |

|                                         |                                                                                                                                                                                                              |
|-----------------------------------------|--------------------------------------------------------------------------------------------------------------------------------------------------------------------------------------------------------------|
| <b>Study reference (name)</b>           | <b>Hageluku 1992</b>                                                                                                                                                                                         |
| <b>Methods</b>                          | Sequentially numbered containers<br>Single blind (assessor)<br>Intention to treat<br>No loss to FU                                                                                                           |
| <b>Participants or study population</b> | Europe<br>79 male, 66 female, mean age 69 years<br>100% CT before entry<br>Ischaemic stroke with leg paresis<br>Less than 72 hours since stroke onset                                                        |
| <b>Intervention &amp; comparator</b>    | Rx: Org 10172 sc (375 anti-Xa units 24-hourly); Org 10172 sc (750 anti-Xa units 24-hourly); Org 10172 sc (1250 anti-Xa units 24-hourly)<br>Control: heparin sc (5000 IU 12-hourly)<br>Duration: 9 to 11 days |
| <b>Outcomes</b>                         | Death + cause of death<br>DVT (systematic I <sup>125</sup> scan with venography)<br>PE (symptomatic)<br>Intracranial haemorrhage (systematic CT)<br>Extracranial haemorrhage                                 |
| <b>Notes</b>                            | Ex: BP greater than 200/120, bleeding risk<br>FU: 3 months                                                                                                                                                   |

|                      |                                        |
|----------------------|----------------------------------------|
| <b>Study:</b>        | <b>Outcome: Mortality/Survival</b>     |
| <b>Bias</b>          | No serious                             |
| <b>Indirectness</b>  | No serious                             |
| <b>Inconsistency</b> | No serious                             |
| <b>Imprecision</b>   | Serious – not powered for this outcome |

|                            |                                                    |
|----------------------------|----------------------------------------------------|
| <b>Quality of evidence</b> | <b>Moderate</b>                                    |
|                            | <b>Outcome: Intracranial haemorrhage</b>           |
| <b>Bias</b>                | No serious                                         |
| <b>Indirectness</b>        | No serious                                         |
| <b>Inconsistency</b>       | No serious                                         |
| <b>Imprecision</b>         | Serious – not powered for this outcome             |
| <b>Quality of evidence</b> | <b>Moderate</b>                                    |
|                            | <b>Outcome: Pulmonary embolism</b>                 |
| <b>Bias</b>                | No serious                                         |
| <b>Indirectness</b>        | No serious                                         |
| <b>Inconsistency</b>       | No serious                                         |
| <b>Imprecision</b>         | Serious – not powered for this outcome             |
| <b>Quality of evidence</b> | <b>Moderate</b>                                    |
|                            | <b>Outcome: Major bleeding</b>                     |
| <b>Bias</b>                | No serious                                         |
| <b>Indirectness</b>        | No serious                                         |
| <b>Inconsistency</b>       | No serious                                         |
| <b>Imprecision</b>         | Serious – not powered for this outcome             |
| <b>Quality of evidence</b> | <b>Moderate</b>                                    |
|                            | <b>Outcome: All DVT (including asymptomatic)</b>   |
| <b>Bias</b>                | No serious                                         |
| <b>Indirectness</b>        | No serious                                         |
| <b>Inconsistency</b>       | Serious – significant heterogeneity between trials |
| <b>Imprecision</b>         | Serious – not powered for this outcome             |
| <b>Quality of evidence</b> | <b>Low</b>                                         |

|                                         |                                                                                                                                                                                                                                                               |
|-----------------------------------------|---------------------------------------------------------------------------------------------------------------------------------------------------------------------------------------------------------------------------------------------------------------|
| <b>Study reference (name)</b>           | <b>Hillbom 1994</b>                                                                                                                                                                                                                                           |
| <b>Methods</b>                          | Sequentially numbered containers<br>Double blind<br>Intention to treat<br>No loss to FU                                                                                                                                                                       |
| <b>Participants or study population</b> | Finland<br>127 male, 85 female, mean age 69 years<br>100% CT before entry<br>Ischaemic stroke with leg paresis for more than 24 hours since stroke onset                                                                                                      |
| <b>Intervention &amp; comparator</b>    | Rx: enoxaparin (40 mg once daily)<br>Control: heparin sc (5000 IU 8-hourly)<br>Duration: 10 ± 2 days or discharge if sooner                                                                                                                                   |
| <b>Outcomes</b>                         | Death<br>DVT (systematic venography)<br>PE (symptomatic)<br>Extracranial haemorrhage<br>Intracranial haemorrhage (systematic CT)                                                                                                                              |
| <b>Notes</b>                            | EX: specified by protocol - includes bleeding risk; Glasgow Coma Scale less than 9; pre-existing DVT<br>FU: 3 months<br>Sponsoring pharmaceutical company stopped before planned sample size of 400 patients recruited, because of very slow recruitment rate |

|                     |                                    |
|---------------------|------------------------------------|
| <b>Study:</b>       | <b>Outcome: Mortality/Survival</b> |
| <b>Bias</b>         | No serious                         |
| <b>Indirectness</b> | No serious                         |

|                            |                                                    |
|----------------------------|----------------------------------------------------|
| <b>Inconsistency</b>       | No serious                                         |
| <b>Imprecision</b>         | Serious – not powered for this outcome             |
| <b>Quality of evidence</b> | <b>Moderate</b>                                    |
|                            | <b>Outcome: Intracranial haemorrhage</b>           |
| <b>Bias</b>                | No serious                                         |
| <b>Indirectness</b>        | No serious                                         |
| <b>Inconsistency</b>       | No serious                                         |
| <b>Imprecision</b>         | Serious – not powered for this outcome             |
| <b>Quality of evidence</b> | <b>Moderate</b>                                    |
|                            | <b>Outcome: Pulmonary embolism</b>                 |
| <b>Bias</b>                | No serious                                         |
| <b>Indirectness</b>        | No serious                                         |
| <b>Inconsistency</b>       | No serious                                         |
| <b>Imprecision</b>         | Serious – not powered for this outcome             |
| <b>Quality of evidence</b> | <b>Moderate</b>                                    |
|                            | <b>Outcome: Extracranial bleeding</b>              |
|                            | No serious                                         |
| <b>Bias</b>                | No serious                                         |
| <b>Indirectness</b>        | No serious                                         |
| <b>Inconsistency</b>       | Serious – not powered for this outcome             |
| <b>Imprecision</b>         | <b>Moderate</b>                                    |
|                            | <b>Outcome: Symptomatic DVT</b>                    |
| <b>Bias</b>                | No serious                                         |
| <b>Indirectness</b>        | No serious                                         |
| <b>Inconsistency</b>       | No serious                                         |
| <b>Imprecision</b>         | Serious – not powered for this outcome             |
| <b>Quality of evidence</b> | <b>Moderate</b>                                    |
|                            | <b>Outcome: All DVT (including asymptomatic)</b>   |
| <b>Bias</b>                | No serious                                         |
| <b>Indirectness</b>        | No serious                                         |
| <b>Inconsistency</b>       | Serious – significant heterogeneity between trials |
| <b>Imprecision</b>         | Serious – not powered for this outcome             |
| <b>Quality of evidence</b> | <b>Low</b>                                         |

|                                         |                                                                                                                                                                                                             |
|-----------------------------------------|-------------------------------------------------------------------------------------------------------------------------------------------------------------------------------------------------------------|
| <b>Study reference (name)</b>           | <b>Prevail 2007</b>                                                                                                                                                                                         |
| <b>Methods</b>                          | Blocked and stratified randomisation, telephone to central randomisation system<br>Study treatment was not blinded<br>Intention to treat<br>Losses to follow up: 32 (15 Rx, 17 control)                     |
| <b>Participants or study population</b> | International<br>994 male, 768 female, mean age 66 years<br>100% CT or MRI before entry<br>Ischaemic stroke and unable to walk unassisted<br>Less than 48 hours since stroke onset<br>NIHSS score 2 or more |
| <b>Intervention &amp; comparator</b>    | Rx: enoxaparin 40 mg sc once daily<br>Control: heparin sc (5000 IU 12-hourly)<br>Duration: 10 days (range 6 to 14)                                                                                          |
| <b>Outcomes</b>                         | Death<br>DVT (systematic venography or ultrasound if venography not possible)<br>PE (symptomatic)<br>Extracranial haemorrhage                                                                               |

|              |                                                                                         |
|--------------|-----------------------------------------------------------------------------------------|
|              | Intracranial haemorrhage (systematic CT)<br>Modified Rankin Scale                       |
| <b>Notes</b> | Ex: specified by protocol<br>FU: 90 days<br>Sponsored by Sanofi-Aventis (Paris, France) |

|                            |                                                             |
|----------------------------|-------------------------------------------------------------|
| <b>Study:</b>              | <b>Outcome: Mortality/Survival</b>                          |
| <b>Bias</b>                | No serious                                                  |
| <b>Indirectness</b>        | No serious                                                  |
| <b>Inconsistency</b>       | No serious                                                  |
| <b>Imprecision</b>         | Not powered for this outcome                                |
| <b>Quality of evidence</b> | <b>Moderate</b>                                             |
|                            | <b>Outcome: Disability</b>                                  |
| <b>Bias</b>                | Serious – no blinded assessment                             |
| <b>Indirectness</b>        | No serious                                                  |
| <b>Inconsistency</b>       | No serious                                                  |
| <b>Imprecision</b>         | Not powered for this outcome                                |
| <b>Quality of evidence</b> | <b>Low</b>                                                  |
|                            | <b>Outcome: Intracranial haemorrhage</b>                    |
| <b>Bias</b>                | No serious – not blinded but confirmed by blinded committee |
| <b>Indirectness</b>        | No serious                                                  |
| <b>Inconsistency</b>       | No serious                                                  |
| <b>Imprecision</b>         | Not powered for this outcome                                |
| <b>Quality of evidence</b> | <b>Moderate</b>                                             |
|                            | <b>Outcome: Pulmonary embolism</b>                          |
| <b>Bias</b>                | No serious– not blinded but confirmed by blinded committee  |
| <b>Indirectness</b>        | No serious                                                  |
| <b>Inconsistency</b>       | No serious                                                  |
| <b>Imprecision</b>         | Not powered for this outcome                                |
| <b>Quality of evidence</b> | <b>Moderate</b>                                             |
|                            | <b>Outcome: Extracranial bleeding</b>                       |
| <b>Bias</b>                | No serious– not blinded but confirmed by blinded committee  |
| <b>Indirectness</b>        | No serious                                                  |
| <b>Inconsistency</b>       | No serious                                                  |
| <b>Imprecision</b>         | Not powered for this outcome                                |
| <b>Quality of evidence</b> | <b>Moderate</b>                                             |
|                            | <b>Outcome: Symptomatic DVT</b>                             |
| <b>Bias</b>                | No serious– not blinded but confirmed by blinded committee  |
| <b>Indirectness</b>        | No serious                                                  |
| <b>Inconsistency</b>       | No serious                                                  |
| <b>Imprecision</b>         | Not powered for this outcome                                |
| <b>Quality of evidence</b> | <b>Moderate</b>                                             |
|                            | <b>Outcome: All DVT (including asymptomatic)</b>            |
| <b>Bias</b>                | No serious                                                  |
| <b>Indirectness</b>        | No serious                                                  |
| <b>Inconsistency</b>       | No serious                                                  |
| <b>Imprecision</b>         | No serious                                                  |
| <b>Quality of evidence</b> | <b>High</b>                                                 |

|                               |                                                                                                                                |
|-------------------------------|--------------------------------------------------------------------------------------------------------------------------------|
| <b>Study reference (name)</b> | <b>Protect 2006</b>                                                                                                            |
| <b>Methods</b>                | R = computer-generated randomisation list<br>Double-blind<br>Intention to treat<br>Losses to follow up: 67 (34 Rx, 33 control) |

|                                         |                                                                                                                                                                                                        |
|-----------------------------------------|--------------------------------------------------------------------------------------------------------------------------------------------------------------------------------------------------------|
| <b>Participants or study population</b> | European Union<br>313 male, 232 female, 18 to 85 years, mean age 67 years<br>100% CT before entry<br>Ischaemic stroke with leg paresis<br>Less than 24 hours since stroke onset<br>NIHSS score 4 to 30 |
| <b>Intervention &amp; comparator</b>    | Rx: certoparin sc (3000 U once daily) plus 2 injections of placebo<br>Control: heparin sc (5000 IU 8-hourly)<br>Duration: 12 to 16 days                                                                |
| <b>Outcomes</b>                         | Death<br>Proximal leg DVT (ultrasound)<br>PE (symptomatic) – none occurred<br>Extracranial haemorrhage<br>Intracranial haemorrhage (systematic CT)                                                     |
| <b>Notes</b>                            | Ex: specified by protocol - includes bleeding risk, body weight less than 55 kg<br>FU: 3 months<br>Sponsored by Novartis (Nürnberg, Germany)                                                           |

|                            |                                                            |
|----------------------------|------------------------------------------------------------|
| <b>Study:</b>              | <b>Outcome: Mortality/Survival</b>                         |
| <b>Bias</b>                | No serious                                                 |
| <b>Indirectness</b>        | No serious                                                 |
| <b>Inconsistency</b>       | No serious                                                 |
| <b>Imprecision</b>         | Serious – not powered to detect difference in this outcome |
| <b>Quality of evidence</b> | <b>Moderate</b>                                            |
|                            | <b>Outcome: Intracranial haemorrhage</b>                   |
| <b>Bias</b>                | No serious                                                 |
| <b>Indirectness</b>        | No serious                                                 |
| <b>Inconsistency</b>       | No serious                                                 |
| <b>Imprecision</b>         | Serious – not powered to detect difference in this outcome |
| <b>Quality of evidence</b> | <b>Moderate</b>                                            |
|                            | <b>Outcome: Extracranial bleeding</b>                      |
| <b>Bias</b>                | No serious                                                 |
| <b>Indirectness</b>        | No serious                                                 |
| <b>Inconsistency</b>       | No serious                                                 |
| <b>Imprecision</b>         | Serious – not powered to detect difference in this outcome |
| <b>Quality of evidence</b> | <b>Moderate</b>                                            |
|                            | <b>Outcome: All DVT (including asymptomatic)</b>           |
| <b>Bias</b>                | No serious                                                 |
| <b>Indirectness</b>        | No serious                                                 |
| <b>Inconsistency</b>       | No serious                                                 |
| <b>Imprecision</b>         | Serious – not powered to detect difference in this outcome |
| <b>Quality of evidence</b> | <b>Moderate</b>                                            |

|                                         |                                                                                                                                              |
|-----------------------------------------|----------------------------------------------------------------------------------------------------------------------------------------------|
| <b>Study reference (name)</b>           | <b>Stiekema 1988 (Hossman et al 1986)</b>                                                                                                    |
| <b>Methods</b>                          | Sequentially numbered containers<br>Single blind (assessor)<br>Not quite intention to treat because 2 patients excluded from analysis        |
| <b>Participants or study population</b> | Europe<br>43 male, 39 female, 21 to 91 years<br>100% CT before entry<br>Ischaemic stroke with leg paresis<br>Less than 72 hours since stroke |



|                                      |                                                                                                                                                                                                        |
|--------------------------------------|--------------------------------------------------------------------------------------------------------------------------------------------------------------------------------------------------------|
| <b>Intervention &amp; comparator</b> | Rx: loading dose 1000 anti-Xa units iv, then Org 10172 sc (1250 anti-Xa units 12-hourly) or Org 10172 sc (750 anti-Xa units 12-hourly)<br>Control: heparin sc (5000 IU 12-hourly)<br>Duration: 10 days |
| <b>Outcomes</b>                      | Death + cause of death<br>DVT (systematic I <sup>125</sup> scan with venography)<br>PE (symptomatic)<br>Intracranial haemorrhage (systematic CT)<br>Extracranial haemorrhage                           |
| <b>Notes</b>                         | Ex: BP greater than 200/120, bleeding risk<br>FU: 14 days                                                                                                                                              |

|                            |                                                            |
|----------------------------|------------------------------------------------------------|
| <b>Study:</b>              | <b>Outcome: Mortality/Survival</b>                         |
| <b>Bias</b>                | No serious                                                 |
| <b>Indirectness</b>        | No serious                                                 |
| <b>Inconsistency</b>       | No serious                                                 |
| <b>Imprecision</b>         | Serious – not powered to detect difference in this outcome |
| <b>Quality of evidence</b> | <b>Moderate</b>                                            |
|                            | <b>Outcome: Pulmonary embolism</b>                         |
| <b>Bias</b>                | No serious                                                 |
| <b>Indirectness</b>        | No serious                                                 |
| <b>Inconsistency</b>       | No serious                                                 |
| <b>Imprecision</b>         | Serious – not powered to detect difference in this outcome |
| <b>Quality of evidence</b> | <b>Moderate</b>                                            |
|                            | <b>Outcome: Intracranial haemorrhage</b>                   |
| <b>Bias</b>                | No serious                                                 |
| <b>Indirectness</b>        | No serious                                                 |
| <b>Inconsistency</b>       | No serious                                                 |
| <b>Imprecision</b>         | Serious – not powered to detect difference in this outcome |
| <b>Quality of evidence</b> | <b>Moderate</b>                                            |
|                            | <b>Outcome: Extracranial bleeding</b>                      |
| <b>Bias</b>                | No serious                                                 |
| <b>Indirectness</b>        | No serious                                                 |
| <b>Inconsistency</b>       | No serious                                                 |
| <b>Imprecision</b>         | Serious – not powered to detect difference in this outcome |
| <b>Quality of evidence</b> | <b>Moderate</b>                                            |
|                            | <b>Outcome: All DVT (including asymptomatic)</b>           |
| <b>Bias</b>                | No serious                                                 |
| <b>Indirectness</b>        | No serious                                                 |
| <b>Inconsistency</b>       | No serious                                                 |
| <b>Imprecision</b>         | Serious – not powered to detect difference in this outcome |
| <b>Quality of evidence</b> | <b>Moderate</b>                                            |

|                                         |                                                                                                                          |
|-----------------------------------------|--------------------------------------------------------------------------------------------------------------------------|
| <b>Study reference (name)</b>           | <b>Turpie 1992</b>                                                                                                       |
| <b>Methods</b>                          | Sequentially numbered identical containers<br>Double blind<br>Intention to treat<br>No loss to FU                        |
| <b>Participants or study population</b> | Canada<br>38 male, 49 female, mean age 72 years<br>100% CT before entry<br>Non-embolic ischaemic stroke with leg paresis |

|                                      |                                                                                                                                                   |
|--------------------------------------|---------------------------------------------------------------------------------------------------------------------------------------------------|
|                                      | Less than 7 days since stroke onset                                                                                                               |
| <b>Intervention &amp; comparator</b> | Rx: Org 10172 sc (750 anti-Xa units 12-hourly)<br>Control: heparin sc (5000 IU 12-hourly)<br>Duration: 14 days                                    |
| <b>Outcomes</b>                      | Death<br>DVT (systematic I <sup>125</sup> scan + plethysmography with venography)<br>PE (symptomatic)<br>Intracranial haemorrhage (systematic CT) |
| <b>Notes</b>                         | Ex: bleeding risk; pre-existing DVT<br>FU: 3 months                                                                                               |

|                            |                                                  |
|----------------------------|--------------------------------------------------|
| <b>Study:</b>              | <b>Outcome: Mortality/Survival</b>               |
| <b>Bias</b>                | No serious                                       |
| <b>Indirectness</b>        | No serious                                       |
| <b>Inconsistency</b>       | No serious                                       |
| <b>Imprecision</b>         | Serious – very small numbers                     |
| <b>Quality of evidence</b> | <b>Moderate</b>                                  |
|                            | <b>Outcome: Intracranial haemorrhage</b>         |
| <b>Bias</b>                | No serious                                       |
| <b>Indirectness</b>        | No serious                                       |
| <b>Inconsistency</b>       | No serious                                       |
| <b>Imprecision</b>         | Serious – very small numbers                     |
| <b>Quality of evidence</b> | <b>Moderate</b>                                  |
|                            | <b>Outcome: Pulmonary embolism</b>               |
| <b>Bias</b>                | No serious                                       |
| <b>Indirectness</b>        | No serious                                       |
| <b>Inconsistency</b>       | No serious                                       |
| <b>Imprecision</b>         | Serious – very small numbers                     |
| <b>Quality of evidence</b> | <b>Moderate</b>                                  |
|                            | <b>Outcome: Major bleeding</b>                   |
| <b>Bias</b>                | No serious                                       |
| <b>Indirectness</b>        | No serious                                       |
| <b>Inconsistency</b>       | No serious                                       |
| <b>Imprecision</b>         | Serious – very small numbers                     |
|                            | <b>Moderate</b>                                  |
|                            | <b>Outcome: All DVT (including asymptomatic)</b> |
| <b>Bias</b>                | No serious                                       |
| <b>Indirectness</b>        | No serious                                       |
| <b>Inconsistency</b>       | No serious                                       |
| <b>Imprecision</b>         | Serious – very small numbers                     |
| <b>Quality of evidence</b> | <b>Moderate</b>                                  |
